# Supplementary material for: The impact of parental psychological control on externalizing problem behaviors in adolescents: the sequential mediating role of basic psychological need fulfillment and sense of defeat
Source: Front Psychol. 2025 Jun 5;16:1533715. doi: 10.3389/fpsyg.2025.1533715 (PMC12178063; doi:10.3389/fpsyg.2025.1533715)
Supplement: Supplementary file 1 [file Table_1.XLS]

## Sheet: 12
性别	年级	年龄	父亲文化程度	母亲文化程度	父亲的职业	母亲的职业	我家没有足够的钱买新衣服	我家没有足够的钱买我喜欢的食物	我家没有足够的钱买好的住房	我家没有剩余的钱供一家人去娱乐	a1	a2	a3	a4	a5	a6	a7	a8	a9	a10	a11	a12	a13	a14	a15	a16	a17	a18	b1	b2	b3	b4	b5	b6	b7	b8	b9	b10	b11	b12	b13	b14	b15	b16	b17	b18	b19	c1	c2
1	1	2	4	3	1	1	1	1	1	1	5	5	3	3	3	2	5	5	2	1	5	4	3	3	5	4	4	4	5	2	7	4	3	2	7	7	5	4	7	4	2	3	4	1	3	3	5	1	2
1	2	2	2	2	1	2	1	1	1	2	3	5	5	5	5	5	3	5	2	1	5	5	5	3	5	1	5	5	7	1	1	4	4	1	7	7	4	7	4	7	1	1	7	1	1	1	5	0	0
2	3	3	1	1	2	2	3	3	3	3	4	5	4	5	4	5	3	5	5	3	3	4	4	5	3	4	3	5	3	6	4	6	5	2	6	6	3	5	4	4	3	2	5	1	2	2	5	2	3
1	3	4	4	4	1	1	1	1	1	1	4	5	4	4	3	3	4	4	5	2	5	4	4	5	5	4	5	5	4	4	2	3	5	4	5	1	1	4	4	4	4	6	1	6	2	1	4	3	3
1	3	4	3	3	1	1	1	1	1	1	3	3	1	3	3	3	3	1	1	1	1	4	4	3	1	3	3	5	6	4	2	4	4	4	7	4	4	4	4	4	4	4	4	4	4	4	4	3	3
2	2	3	3	3	1	1	1	1	1	1	3	3	3	3	3	3	3	3	4	3	3	4	4	5	4	3	4	5	3	5	4	4	4	1	5	2	6	2	2	2	7	7	1	7	4	6	3	1	3
2	2	3	3	3	1	1	1	1	1	1	3	3	3	3	3	3	3	3	4	3	3	4	4	5	4	3	4	5	3	3	4	4	4	7	5	2	2	2	2	2	1	1	1	1	4	2	3	1	1
1	3	3	3	2	1	1	1	5	5	5	4	4	5	5	5	5	5	5	5	5	5	5	5	5	5	5	5	5	7	1	1	3	4	1	4	4	2	2	3	2	1	1	1	7	1	1	3	3	4
1	2	3	2	3	1	2	2	2	2	2	5	5	5	5	4	5	5	5	4	3	4	4	3	4	5	4	5	5	5	3	4	5	5	4	3	3	4	5	4	4	3	4	3	3	3	3	3	2	2
1	3	3	2	4	1	1	5	4	4	5	5	4	3	5	5	5	4	2	5	5	3	3	4	1	1	5	4	2	7	2	2	4	6	4	7	7	6	1	7	7	1	1	7	7	7	6	1	0	2
1	2	3	2	3	1	2	2	2	2	2	5	5	5	5	4	5	5	5	4	3	4	4	3	4	5	4	5	5	5	5	4	5	5	4	3	3	4	5	4	4	5	4	3	5	5	5	3	2	2
1	1	1	2	2	1	1	1	1	1	1	1	2	4	1	1	1	4	5	1	4	5	1	1	1	1	5	5	5	7	1	1	6	7	1	7	6	7	2	7	3	1	1	4	1	1	1	2	3	3
1	3	5	2	2	2	2	1	2	2	3	3	2	2	5	5	5	3	2	1	2	2	4	3	5	5	5	4	5	6	1	1	4	6	1	1	4	1	2	5	2	2	1	6	1	1	1	2	4	3
1	3	4	4	1	2	1	1	1	2	3	5	5	5	5	4	3	2	1	1	2	2	1	2	4	2	3	5	5	4	1	2	6	6	3	7	6	2	7	5	6	2	1	7	7	4	1	6	2	2
2	1	1	1	3	1	1	2	2	1	5	2	4	1	1	1	5	3	4	1	1	4	1	1	1	5	1	4	2	4	2	2	4	5	2	2	4	7	4	4	2	3	3	4	5	3	5	2	2	3
1	3	4	2	1	2	1	1	1	1	1	4	1	4	4	2	1	2	1	1	2	1	4	1	1	3	3	1	4	7	1	2	2	4	4	3	3	5	2	4	4	6	5	3	4	2	5	2	3	3
1	1	2	3	3	2	1	1	1	2	1	4	4	4	3	2	4	4	3	1	3	4	2	2	2	5	2	2	5	6	3	2	5	3	6	5	5	2	6	6	5	3	3	6	5	3	2	5	3	3
1	1	2	3	3	1	1	1	1	2	1	5	5	2	1	1	2	1	1	1	1	1	1	1	1	1	1	5	3	4	7	7	1	7	7	7	1	2	7	7	1	7	7	1	7	7	6	7	0	3
2	1	2	2	2	1	1	3	1	4	5	4	2	1	1	3	5	4	1	4	1	4	1	4	2	2	3	3	4	2	4	2	5	2	6	4	3	3	7	4	2	2	5	4	3	3	2	3	3	4
1	1	1	2	2	1	2	2	1	1	1	4	1	1	1	1	1	1	1	1	1	1	1	1	1	1	1	1	1	7	3	3	7	7	1	7	7	7	7	7	1	7	1	7	7	7	7	3	2	0
1	2	3	2	3	2	2	1	1	1	1	3	3	3	3	3	3	5	3	3	3	3	3	3	3	3	3	3	3	7	1	1	7	7	1	6	6	1	7	7	4	1	3	7	3	1	1	7	0	0
1	1	1	1	1	1	2	1	1	1	1	3	2	3	4	4	5	5	5	5	4	4	2	5	1	5	5	5	5	6	1	1	6	2	6	7	2	1	3	2	3	1	5	2	5	3	2	5	4	3
2	3	4	2	3	2	1	1	1	1	1	1	2	1	4	2	3	1	4	1	1	2	4	4	1	3	4	5	5	6	2	1	6	4	2	1	4	1	5	4	2	2	2	2	4	2	4	3	4	4
1	1	1	1	1	2	2	3	5	5	4	1	1	2	5	3	5	2	2	1	4	2	4	3	1	5	5	5	5	4	1	1	2	2	1	3	2	3	2	2	1	7	7	3	6	3	3	2	3	2
2	3	4	2	3	1	1	1	1	1	1	1	1	1	1	5	5	5	5	1	5	5	1	5	1	5	5	5	5	5	1	1	5	5	2	6	6	1	7	6	6	3	2	6	2	1	2	7	4	0
2	1	2	2	2	2	2	2	4	2	3	4	4	1	1	1	2	4	2	1	2	1	1	1	1	4	1	5	4	5	2	3	5	2	2	2	2	6	6	5	1	3	1	6	1	2	2	6	4	3
2	3	4	1	2	2	2	1	1	2	2	3	5	5	4	4	5	4	5	3	2	3	4	4	5	5	4	5	5	6	1	1	6	5	1	3	5	3	5	5	5	2	2	5	3	1	2	6	2	2
1	1	1	1	1	1	1	3	3	4	5	2	2	3	3	3	3	3	3	3	3	2	2	2	3	3	3	4	2	5	3	3	5	4	4	4	6	3	5	6	4	4	4	4	4	4	3	7	1	3
1	3	4	3	3	2	2	1	1	1	1	3	4	2	2	3	2	2	2	2	3	3	2	2	2	2	3	2	4	5	4	3	4	4	2	4	4	4	4	4	4	4	4	4	3	2	2	3	2	2
2	3	4	1	3	2	2	1	1	1	1	5	5	5	5	5	5	5	5	5	3	5	4	4	4	5	5	5	5	2	6	6	3	3	7	3	3	3	2	6	2	7	7	6	6	7	7	2	4	1
1	1	1	1	2	1	1	3	3	1	1	1	3	3	3	5	5	5	5	5	2	2	5	5	5	5	5	5	5	3	7	1	7	7	7	7	5	1	3	7	5	7	7	7	5	7	1	5	2	3
2	2	2	3	3	2	1	2	2	3	3	2	3	4	2	3	2	5	4	1	2	1	1	1	1	2	2	4	4	6	2	4	2	4	5	5	6	2	3	6	4	1	3	2	6	2	2	6	2	3
2	1	2	3	3	1	1	3	1	4	5	5	5	5	5	4	5	5	5	4	2	5	5	4	5	5	5	4	5	5	7	7	3	3	2	3	1	2	2	2	2	4	7	6	7	7	6	3	4	1
2	1	2	3	3	1	1	3	1	4	5	5	5	5	5	4	5	5	5	4	2	5	5	4	2	5	5	4	5	2	6	2	1	3	4	4	4	1	4	4	4	4	1	4	4	4	4	4	4	1
2	2	2	3	3	2	1	2	2	3	3	2	3	4	2	3	2	5	4	1	2	1	1	1	1	2	2	4	4	6	6	4	2	4	3	5	6	6	3	6	4	7	5	2	2	6	6	6	2	1
1	3	4	2	2	1	1	1	1	1	1	4	1	1	1	1	2	5	5	1	5	4	4	3	3	3	3	4	4	2	1	4	5	2	1	2	2	3	2	2	1	1	2	6	3	3	3	5	2	3
1	2	2	1	1	2	2	3	3	3	3	4	5	5	4	5	5	5	5	4	5	5	5	5	5	5	5	5	5	6	2	1	6	6	2	6	6	1	6	7	6	2	2	6	2	1	1	6	3	2
1	1	2	2	2	1	1	1	1	1	3	4	2	2	2	1	4	2	3	1	2	3	4	2	3	2	1	4	3	4	2	4	7	3	7	2	5	1	5	6	3	5	6	1	3	6	7	4	1	2
2	1	2	3	3	2	2	2	2	2	2	3	4	4	2	2	4	3	4	1	1	1	1	4	1	4	1	2	4	5	2	4	2	7	6	1	2	3	1	3	3	2	3	5	1	4	4	2	3	4
1	3	3	2	1	1	2	3	2	3	4	2	2	2	2	1	2	1	1	1	1	4	4	2	1	2	1	1	1	1	7	6	4	3	1	7	5	4	6	7	6	1	5	4	4	6	3	6	2	2
1	3	4	2	2	1	1	1	1	1	1	2	2	3	2	3	2	2	3	2	3	2	3	2	2	2	3	2	3	7	3	1	5	7	3	7	5	1	5	7	5	1	3	7	3	1	3	7	0	2
1	3	3	3	3	1	1	4	4	4	4	4	4	4	4	1	4	2	3	1	1	3	1	1	2	1	2	4	4	6	4	2	4	5	6	2	1	4	6	5	5	5	7	4	7	4	4	6	1	2
1	3	3	2	2	1	1	2	2	1	1	4	4	4	4	4	4	4	4	4	3	4	4	3	3	3	5	4	4	2	3	5	5	5	5	5	5	5	3	4	3	5	5	3	5	3	5	3	1	2
1	1	1	3	3	1	2	1	1	1	1	3	3	2	4	4	4	3	3	3	2	2	2	2	1	2	1	2	2	3	6	4	3	2	5	2	2	5	2	1	3	7	5	2	7	6	6	3	3	2
1	2	2	1	1	1	1	1	1	1	1	1	2	1	2	2	2	1	2	1	1	1	1	1	1	4	2	4	5	5	2	6	6	4	1	5	4	1	3	7	4	3	3	3	1	1	1	7	1	4
2	2	2	1	4	2	1	1	1	1	1	5	4	2	4	4	5	4	4	1	4	4	5	5	1	4	4	5	5	6	1	5	5	6	2	7	6	5	7	7	7	6	2	7	1	2	7	7	1	4
2	2	2	1	4	2	1	1	1	1	1	5	4	2	4	4	5	4	4	1	4	4	5	5	1	4	4	5	5	6	7	3	5	6	6	7	6	3	7	7	7	2	6	7	7	6	1	7	1	0
1	2	2	1	2	2	2	1	1	2	1	4	4	4	1	4	4	2	5	2	1	5	5	5	4	1	4	5	5	7	4	1	5	4	1	5	4	5	5	6	3	2	2	7	7	4	5	6	0	2
1	2	2	1	2	2	2	1	1	2	1	4	4	4	1	4	4	2	5	2	1	5	5	5	4	1	4	5	5	7	4	7	5	4	7	5	4	3	5	6	3	6	6	7	1	4	3	6	0	2
1	1	2	1	2	1	1	2	3	2	2	2	3	2	1	1	2	1	1	1	2	1	1	1	2	3	1	4	4	1	7	6	5	3	3	2	6	4	5	5	6	3	2	2	6	6	5	2	1	3
2	1	1	2	2	2	2	1	1	1	2	5	5	3	1	1	4	5	5	3	1	1	1	3	5	4	4	5	5	5	7	5	4	3	7	4	5	5	4	4	4	7	7	3	7	5	5	3	1	1
2	2	3	3	2	1	1	1	1	1	1	2	1	1	3	3	4	3	1	1	1	1	4	4	1	1	3	2	1	3	6	4	5	5	4	2	3	5	4	5	4	4	2	5	5	5	5	4	0	3
1	1	1	4	2	1	1	2	1	1	1	5	5	1	1	1	1	1	1	1	1	3	1	1	1	1	1	1	1	7	7	5	6	6	1	7	5	6	5	1	1	7	1	7	2	1	1	1	2	2
2	1	1	1	1	2	2	1	1	2	2	5	3	3	1	1	1	2	3	1	3	3	3	1	3	1	2	1	5	7	1	1	6	7	7	3	1	7	3	3	5	7	5	4	7	7	1	7	3	4
2	2	3	3	2	1	1	1	1	1	1	2	1	1	3	3	4	3	1	1	1	1	4	4	1	1	3	2	1	3	2	4	5	5	4	2	3	3	4	5	4	4	6	5	3	3	3	4	0	1
2	1	1	1	1	1	1	1	1	1	1	5	5	5	5	1	4	1	1	1	1	1	1	1	1	1	5	5	5	4	4	4	4	4	4	4	4	2	7	7	7	2	2	7	7	1	1	7	0	3
2	1	2	3	3	1	2	3	3	5	5	5	3	5	5	5	5	5	5	4	5	5	5	4	5	5	5	5	5	7	1	1	5	7	3	4	4	1	5	2	4	1	3	2	1	1	1	3	4	4
2	1	1	2	3	1	1	1	1	1	1	5	5	5	2	3	4	5	5	4	3	3	3	3	3	3	3	3	3	2	1	1	1	1	1	4	3	1	3	2	2	1	7	3	6	1	2	4	4	2
2	3	3	1	2	2	2	3	2	1	3	4	5	5	5	5	5	4	5	3	2	5	5	5	4	5	5	5	5	6	1	1	4	6	3	3	1	5	3	4	3	2	3	4	4	1	5	4	4	4
2	1	1	2	2	1	2	2	2	2	2	4	4	4	4	4	4	4	5	4	4	4	5	4	4	4	4	5	5	4	3	3	2	1	6	2	5	5	4	2	2	3	3	2	3	3	3	2	3	3
1	1	1	4	2	2	2	1	1	1	1	3	5	4	4	4	4	5	5	4	4	5	4	4	4	5	5	5	5	4	7	7	3	5	2	5	4	3	4	6	4	3	3	2	2	5	6	4	4	2
2	3	3	2	1	2	1	2	1	3	2	3	3	4	4	4	4	4	3	3	3	3	4	4	3	3	2	3	4	5	3	3	5	4	6	3	4	5	4	4	4	5	4	3	6	5	5	4	3	2
2	3	3	2	2	2	1	2	2	2	2	2	1	5	5	5	5	5	5	1	1	1	1	1	1	1	1	1	1	4	4	4	5	5	6	6	6	5	7	3	6	7	6	6	3	4	3	7	3	1
2	3	3	2	2	1	2	1	1	5	2	4	1	1	1	1	4	1	1	1	1	1	1	5	1	4	5	4	2	7	2	1	7	4	7	3	5	3	6	4	4	3	3	1	4	2	1	5	4	4
1	1	1	2	2	1	1	1	2	2	3	2	2	2	2	4	4	3	3	2	3	4	3	2	3	3	3	4	5	4	4	4	5	5	3	5	5	2	6	6	6	3	1	4	3	1	3	5	2	3
1	1	1	2	2	1	1	1	1	1	1	2	3	1	1	3	3	3	1	1	1	3	1	3	1	1	3	4	3	1	3	1	2	2	2	1	3	2	1	1	1	4	2	3	2	4	4	2	2	3
2	1	2	3	4	1	1	1	1	1	1	4	2	3	5	1	5	3	5	1	1	5	4	2	1	5	1	5	3	5	3	3	2	2	5	2	1	6	2	2	1	7	5	2	7	2	3	2	3	3
2	1	1	4	3	2	2	3	1	4	1	5	5	5	4	3	3	5	5	3	2	5	4	2	1	4	1	5	1	6	2	3	2	4	2	2	6	2	7	7	6	2	2	5	3	4	5	4	3	1
2	1	2	3	2	1	2	2	2	1	3	2	2	1	1	2	3	2	2	1	1	1	1	1	1	2	1	1	3	4	3	2	6	3	5	4	3	2	7	3	3	5	5	1	4	1	1	7	2	4
2	1	2	3	2	1	1	2	2	1	3	2	2	1	1	2	3	2	2	1	1	1	1	1	1	2	1	1	3	4	3	2	6	3	5	4	3	2	7	3	3	5	5	1	4	1	1	7	2	4
1	3	3	3	2	1	2	2	2	2	2	3	3	3	3	3	3	3	3	3	3	3	3	3	3	3	3	3	3	7	1	1	4	4	2	3	7	4	3	7	1	1	1	4	1	4	4	1	2	2
1	2	3	3	3	1	1	2	1	3	1	5	4	5	5	4	3	5	5	5	5	5	5	5	4	5	5	5	5	4	3	2	5	4	4	4	5	3	5	6	6	2	2	6	4	2	2	6	2	2
2	2	2	2	4	1	2	1	1	2	1	2	2	1	1	1	2	4	2	1	1	2	1	1	1	1	2	1	4	2	3	3	3	5	4	5	5	4	6	5	5	5	4	5	3	5	4	3	2	3
2	2	2	2	4	1	2	1	1	2	1	2	2	1	1	1	2	4	2	1	1	2	1	1	1	1	2	1	4	2	5	5	3	5	4	5	5	4	6	5	5	3	4	5	5	3	4	3	2	1
2	1	2	4	3	1	1	1	1	2	3	2	4	4	3	4	5	4	5	4	3	4	5	5	4	5	3	5	4	2	3	4	6	2	1	2	2	6	3	5	2	3	3	2	5	3	1	5	2	3
1	1	1	2	2	1	1	3	3	2	5	4	3	4	3	3	4	5	5	3	3	3	4	3	3	4	3	4	3	7	1	2	3	2	4	2	4	4	4	2	4	3	4	4	4	1	3	4	2	3
1	3	3	3	4	1	1	3	2	1	3	5	1	5	4	3	5	5	4	1	1	3	3	4	2	5	3	4	5	4	4	3	4	5	2	6	3	3	5	5	5	2	3	6	5	2	4	5	2	2
1	2	2	4	1	1	2	2	2	2	2	4	4	3	3	3	3	3	3	4	3	4	4	2	3	4	4	4	4	5	4	2	4	5	5	3	4	3	4	4	3	5	4	4	5	4	5	4	2	3
2	2	2	1	1	1	2	1	1	2	3	2	4	5	5	5	5	5	5	4	4	5	5	5	5	5	5	5	5	4	2	2	5	5	4	3	3	3	3	4	4	4	3	2	4	4	4	3	2	3
2	1	2	2	2	1	1	2	2	2	2	3	2	3	3	1	2	2	3	1	4	4	1	4	3	2	3	4	3	4	3	3	3	3	3	5	5	5	5	6	3	4	3	6	3	3	4	3	2	2
2	1	2	2	4	2	1	1	1	1	2	5	4	3	1	1	1	1	1	1	1	1	1	2	1	1	1	1	2	5	4	3	3	3	4	4	4	4	2	2	2	4	4	4	3	3	3	3	2	3
1	3	4	1	2	2	2	3	2	1	2	4	4	2	1	2	4	4	2	1	2	1	1	2	3	3	4	5	5	3	3	2	5	4	4	3	4	2	4	6	5	3	3	4	5	4	4	4	2	2
1	3	3	3	3	2	2	1	1	1	1	2	2	1	1	2	2	2	2	2	2	2	2	2	2	2	2	2	2	5	3	3	5	5	5	5	4	5	6	6	6	5	5	6	2	5	5	6	1	2
2	2	2	1	1	1	2	1	1	2	3	2	4	5	5	5	5	5	5	4	4	5	5	5	5	5	5	5	5	4	6	6	5	5	4	3	3	5	3	4	4	4	5	2	4	4	4	3	2	1
1	2	2	4	1	1	2	2	2	2	2	4	4	3	3	3	3	3	3	4	3	4	4	2	3	4	4	4	4	5	4	6	4	5	3	3	4	5	4	4	3	3	4	4	3	4	3	4	2	1
2	1	1	2	4	1	1	1	1	3	2	4	2	3	3	3	2	2	2	1	1	1	2	2	1	1	2	5	4	2	2	4	6	2	4	2	2	7	4	3	3	5	6	3	5	4	5	6	1	4
1	2	2	2	2	2	1	2	1	1	4	2	4	5	4	3	5	2	5	4	3	3	3	1	1	5	4	5	5	3	1	1	4	5	3	4	4	3	3	5	2	4	5	6	7	3	7	2	2	3
1	1	2	2	2	2	2	3	2	2	2	4	4	4	2	2	4	4	4	2	2	2	2	2	4	4	4	4	2	5	4	4	3	3	2	3	5	4	6	7	3	4	4	4	4	4	5	4	2	2
1	2	2	2	2	2	1	2	1	1	4	2	4	5	4	3	5	2	5	4	3	3	3	1	1	5	4	5	5	3	7	7	4	5	5	4	4	5	3	5	2	4	3	6	1	5	1	2	2	1
1	2	3	3	1	1	1	1	1	1	1	1	4	2	1	1	1	1	1	1	1	1	1	1	1	1	1	1	1	4	4	4	4	4	1	1	4	7	5	4	4	2	4	5	5	5	4	7	1	2
1	2	3	3	1	1	1	1	1	1	1	1	4	2	1	1	1	1	1	1	1	1	1	1	1	1	1	1	1	4	4	4	4	4	7	1	4	1	5	4	4	6	4	5	3	3	4	7	1	2
1	1	1	2	1	1	2	3	2	1	2	4	4	3	1	1	4	4	1	1	1	1	1	2	3	2	4	5	2	1	1	1	1	1	2	3	3	2	3	5	3	7	6	6	1	3	5	2	1	0
2	2	2	2	1	2	1	1	1	1	1	4	4	1	1	1	1	4	4	1	1	4	1	1	5	3	4	4	4	3	7	4	5	1	4	3	3	7	5	4	5	7	2	5	7	7	4	5	1	3
2	2	2	2	3	1	1	1	1	1	1	3	4	3	3	2	4	4	3	2	2	2	2	3	2	2	2	3	4	4	3	2	3	5	6	5	6	5	5	5	5	4	6	6	6	4	3	5	1	2
1	1	2	2	2	2	2	3	3	2	4	2	3	3	2	2	1	3	2	2	2	1	1	1	1	3	2	3	3	3	6	4	6	6	6	3	6	5	6	3	7	5	4	3	6	4	5	4	0	2
2	2	3	2	1	1	1	1	1	3	1	1	1	4	3	2	1	1	1	2	3	2	4	1	2	1	1	1	4	4	3	4	4	6	5	3	3	3	4	6	6	3	7	5	3	5	1	5	2	3
1	3	4	4	3	1	1	1	1	1	1	3	4	2	1	1	2	1	4	1	2	2	2	2	2	2	2	2	4	5	4	3	4	5	6	4	4	3	4	4	5	4	5	6	7	4	4	5	1	1
2	2	3	2	1	1	1	1	1	3	1	1	1	4	3	2	1	1	1	2	3	2	4	1	2	1	1	1	4	4	5	4	4	6	3	3	3	5	4	6	6	5	1	5	5	3	7	5	2	1
2	2	2	2	3	1	1	1	1	1	1	3	4	3	3	2	4	4	3	2	2	2	2	3	2	2	2	3	4	4	5	6	3	5	2	5	6	3	5	5	5	4	2	6	2	4	5	5	1	2
2	2	2	2	1	2	1	1	1	1	1	4	4	1	1	1	1	4	4	1	1	4	1	1	5	3	4	4	4	3	1	4	5	1	4	3	3	1	5	4	5	1	6	5	1	1	4	5	1	1
2	3	3	2	1	1	2	1	1	1	1	2	1	1	1	1	1	1	1	1	1	1	1	1	1	1	1	1	2	3	5	4	2	2	4	2	1	5	2	2	2	6	5	4	5	5	6	3	2	4
2	1	1	2	2	1	2	4	1	1	1	3	5	4	4	3	5	5	5	3	3	4	2	1	3	5	3	3	5	2	4	4	3	2	3	1	4	5	7	3	1	5	1	3	1	1	6	3	3	4
2	2	2	1	3	1	1	1	1	1	1	3	2	2	2	1	4	2	4	1	1	2	1	2	1	4	2	3	2	4	4	4	4	4	7	3	3	7	4	4	4	5	7	4	7	7	4	4	2	3
1	2	2	2	2	1	1	1	1	1	1	4	3	3	2	2	2	2	2	2	2	3	4	4	2	4	3	4	2	4	4	4	4	3	4	3	4	5	4	4	4	4	5	4	2	4	4	3	2	2
1	1	2	2	3	1	1	1	1	1	1	5	5	2	1	1	1	1	4	1	1	2	1	1	1	5	4	3	2	4	2	4	4	4	3	4	3	5	6	7	3	5	2	3	3	5	4	4	2	1
1	2	2	2	2	1	1	1	1	1	1	4	3	3	2	2	2	2	2	2	2	3	4	4	2	4	3	4	2	4	4	4	4	3	4	3	4	3	4	4	4	4	3	4	6	4	4	3	2	2
2	1	2	2	2	1	1	2	1	1	2	2	2	3	4	2	4	3	2	2	2	2	4	2	1	1	5	2	4	6	3	1	6	5	1	3	5	5	6	5	3	6	6	2	6	6	3	5	2	3
2	3	3	2	2	1	2	2	2	2	2	4	2	1	1	1	4	2	4	1	1	1	2	2	1	1	1	4	4	5	5	6	2	6	5	2	2	2	6	5	5	5	2	5	3	2	2	6	2	1
2	2	2	1	3	1	1	1	1	1	1	3	2	2	2	1	4	2	4	1	1	2	1	2	1	4	2	3	2	4	4	4	4	4	1	3	3	1	4	4	4	3	1	4	1	1	4	4	2	1
1	1	2	2	2	2	1	1	1	1	2	3	3	1	1	1	4	3	1	1	1	1	1	2	1	1	1	1	1	2	4	4	2	1	7	2	2	5	5	5	5	4	6	2	6	6	6	4	1	3
1	2	2	1	1	1	1	1	1	1	2	1	1	2	1	5	4	2	1	1	1	2	2	5	1	2	1	2	5	7	1	4	5	6	1	6	7	5	7	7	6	1	1	6	2	2	4	4	0	2
1	2	2	3	4	1	2	1	1	1	1	4	4	1	1	4	1	2	1	1	2	4	2	5	2	4	4	1	1	6	7	4	6	6	6	6	1	6	6	5	5	2	3	3	6	6	4	5	0	2
1	1	2	2	2	1	1	1	1	2	1	4	4	4	3	3	2	4	5	1	1	3	2	1	2	5	4	5	4	5	5	3	5	5	3	5	3	5	5	5	5	3	6	4	3	4	4	5	3	2
1	2	2	3	4	1	2	1	1	1	1	4	4	1	1	4	1	2	1	1	2	4	2	5	2	4	4	1	1	6	1	4	6	6	2	6	1	2	6	5	5	6	5	3	2	2	4	5	0	2
2	1	1	1	2	2	1	1	1	2	1	4	1	1	1	1	3	3	4	1	1	2	3	4	1	4	5	5	4	2	1	6	6	5	3	6	5	1	6	6	5	2	2	5	2	2	2	5	1	2
2	1	1	2	2	1	1	1	1	1	1	4	5	1	1	1	1	1	1	1	1	1	1	2	2	1	2	1	1	6	5	6	7	7	7	4	5	7	7	7	7	5	6	5	7	7	6	7	1	1
2	3	3	2	2	1	1	1	1	1	1	3	3	2	4	3	4	3	3	3	3	3	3	4	3	3	3	3	3	5	3	4	5	5	3	3	3	3	4	4	5	3	3	5	3	4	5	4	0	0
2	3	4	1	3	1	2	2	1	3	3	2	2	2	2	2	2	2	2	2	2	2	2	2	2	2	2	2	2	2	4	4	4	5	5	5	4	4	6	4	4	3	4	5	6	6	4	4	2	3
1	2	2	1	1	1	1	1	1	1	2	1	1	2	1	5	4	2	1	1	1	2	2	5	1	2	1	2	5	7	7	4	5	6	7	6	7	3	7	7	6	7	7	6	6	6	4	4	0	2
2	1	1	1	1	2	2	2	1	2	1	1	1	1	1	1	2	1	1	1	2	1	1	1	1	1	1	1	1	6	6	7	2	6	5	7	6	5	5	3	2	2	2	5	5	4	4	5	2	1
1	1	1	2	2	1	2	2	2	2	4	1	1	4	5	5	5	5	4	5	2	5	5	3	3	2	3	4	2	7	2	1	4	7	4	7	7	4	7	7	2	3	5	5	2	1	3	5	3	1
1	1	2	2	3	1	2	3	1	1	1	4	4	4	4	4	4	4	4	4	4	4	4	4	4	4	4	4	4	5	2	3	6	5	2	5	6	3	6	5	6	3	2	5	2	3	2	5	0	2
2	2	3	4	3	1	2	1	1	1	1	1	2	4	1	2	5	2	2	1	1	1	2	1	3	1	2	4	2	2	4	3	3	7	4	4	3	3	7	4	6	3	7	7	6	4	5	7	0	2
2	2	2	2	2	1	1	1	1	1	1	3	2	2	2	2	3	2	1	1	1	1	3	1	1	3	2	1	4	4	2	4	5	4	5	3	1	3	2	5	5	4	2	5	6	2	2	3	1	1
1	2	2	2	2	1	1	1	1	1	1	5	1	2	1	1	4	4	1	1	1	1	1	1	1	1	1	1	2	6	3	4	7	6	4	6	5	4	7	4	5	5	5	1	6	4	2	7	2	1
2	2	2	3	3	2	1	1	1	1	1	1	1	2	1	1	4	4	4	3	4	4	3	1	2	4	3	2	5	6	4	1	6	6	6	2	4	6	3	3	3	5	6	3	6	5	5	5	1	2
2	2	2	3	3	2	1	1	1	1	1	1	1	2	1	1	4	4	4	3	4	4	3	1	2	4	3	2	5	6	4	7	6	6	2	2	4	2	3	3	3	3	2	3	2	3	3	5	1	2
2	3	3	1	1	1	1	1	1	1	1	4	4	2	2	2	4	4	1	2	2	2	1	2	2	1	1	3	4	5	5	3	5	5	6	5	3	3	5	6	6	5	6	5	6	5	6	6	2	3
2	2	2	2	2	1	1	1	1	1	1	3	2	2	2	2	3	2	1	1	1	1	3	1	1	3	2	1	4	4	6	4	5	4	3	3	1	5	2	5	5	4	6	5	2	6	6	3	1	3
1	2	2	2	2	1	1	1	1	1	1	5	1	2	1	1	4	4	1	1	1	1	1	1	1	1	1	1	2	6	5	4	7	6	4	6	5	4	7	4	5	3	3	1	2	4	6	7	2	3
1	3	4	2	2	1	1	1	1	1	1	5	5	4	3	3	3	3	4	3	3	3	3	4	3	3	3	4	3	7	6	2	6	6	5	3	3	4	7	7	7	3	5	7	7	6	2	6	0	1
1	3	3	2	2	1	1	2	2	2	2	1	1	1	1	1	1	1	1	1	1	1	1	1	1	1	1	1	3	7	2	4	2	7	7	2	1	2	7	7	2	2	5	7	5	5	5	5	0	0
1	1	2	2	3	1	1	1	1	5	3	5	5	4	5	1	5	5	5	5	1	1	1	5	5	5	5	5	5	5	2	6	5	2	5	2	5	5	7	3	4	2	2	6	2	3	1	7	0	0
1	1	1	3	3	1	1	1	1	2	1	5	5	5	5	5	3	3	3	3	4	5	5	4	3	4	4	3	4	3	6	5	2	2	6	2	1	6	6	6	5	3	6	5	6	6	4	6	1	3
2	1	2	3	3	1	1	1	1	2	3	2	2	1	2	3	4	1	1	2	3	1	4	4	3	1	1	1	1	4	7	4	3	5	6	2	6	3	5	4	5	4	7	6	7	7	6	3	0	2
1	1	2	1	4	2	1	1	1	1	1	4	3	1	1	3	3	3	1	1	1	1	1	3	2	1	1	2	1	6	1	1	5	7	1	6	4	1	4	4	4	2	1	7	2	1	1	7	0	3
1	1	2	2	2	1	1	3	2	1	3	4	4	2	1	1	3	3	3	1	1	1	1	1	2	3	1	3	4	5	5	5	4	4	3	5	4	3	4	4	4	3	5	4	5	5	3	4	0	2
1	1	2	2	3	1	1	1	1	1	1	1	3	3	4	3	1	1	1	1	2	1	2	3	3	1	2	2	2	2	7	2	2	5	3	7	6	3	2	1	3	7	4	3	2	5	2	3	0	2
1	2	3	3	2	1	2	1	1	1	1	3	4	4	4	1	1	2	1	1	1	1	1	1	2	4	1	2	1	7	3	6	4	5	4	4	6	1	4	5	6	4	1	5	1	1	1	6	0	2
2	2	2	2	2	2	2	1	1	1	1	1	1	1	1	1	4	1	4	1	3	4	3	5	1	3	1	1	5	4	2	6	4	7	5	4	4	1	7	6	7	4	2	6	1	3	5	6	0	1
2	3	3	3	3	2	1	1	1	1	1	4	4	4	3	3	3	3	3	3	2	2	2	1	4	4	2	3	3	5	5	5	3	4	5	4	4	5	4	3	4	5	4	3	4	5	4	3	0	4
2	3	4	1	2	1	2	1	1	1	3	1	3	1	1	1	4	1	1	1	1	1	1	3	1	1	2	1	1	5	2	4	4	2	3	2	3	5	5	6	3	3	5	7	7	4	7	3	2	2
1	1	2	4	4	1	1	1	1	1	1	3	1	1	1	1	1	2	1	1	1	1	2	2	1	1	1	1	1	5	7	5	5	6	6	3	6	6	5	5	3	6	6	5	6	7	5	2	1	2
2	3	4	2	2	1	1	1	1	1	1	2	4	1	2	1	1	4	1	1	1	1	1	1	1	1	2	2	2	3	7	7	2	2	6	2	2	6	5	5	5	6	6	6	7	7	7	6	0	1
2	3	3	1	2	2	1	1	1	1	1	2	2	2	2	4	4	1	1	1	1	1	1	1	1	1	1	1	1	7	4	4	5	6	4	4	2	4	5	4	5	3	4	3	6	6	5	7	0	2
2	1	2	2	4	1	1	1	1	1	1	3	3	2	1	1	1	1	1	2	2	2	2	1	1	1	2	1	2	3	6	6	4	4	5	4	4	6	4	4	4	5	5	4	5	5	6	4	1	1
1	1	1	3	2	2	1	1	1	1	1	4	3	1	1	2	2	2	3	3	1	1	1	2	1	2	2	4	4	4	4	6	2	2	5	4	3	6	4	4	4	3	5	4	5	5	5	4	0	2
1	3	3	1	1	1	1	1	1	1	1	1	4	3	3	3	3	3	3	3	3	4	3	3	3	3	3	3	3	7	3	6	2	3	1	1	1	3	3	3	3	3	3	4	3	3	3	6	1	0
1	2	3	3	2	1	2	1	1	1	1	3	4	4	4	1	1	2	1	1	1	1	1	1	2	4	1	2	1	7	5	2	4	5	4	4	6	7	4	5	6	4	7	5	7	7	7	6	0	2
1	1	2	2	4	1	1	1	1	1	1	4	2	1	1	1	2	1	4	1	1	4	1	1	1	1	1	3	3	1	7	5	2	5	7	7	7	6	7	6	7	7	7	7	7	5	6	2	0	1
2	1	2	3	3	1	1	1	1	1	1	2	2	2	1	2	4	2	2	2	2	2	1	1	1	1	3	4	4	5	4	4	4	6	4	2	4	7	4	6	6	5	3	5	6	2	5	6	1	3
2	2	2	2	2	1	1	3	3	2	1	3	3	3	3	3	3	3	3	3	3	3	3	3	3	3	3	3	3	5	4	4	5	4	5	4	3	2	1	2	3	4	5	6	5	4	3	2	4	4
1	1	1	1	1	2	2	1	1	1	1	4	4	1	1	1	4	5	4	1	1	1	1	1	2	2	5	5	5	1	1	1	5	6	2	1	2	1	6	2	1	6	5	2	2	1	1	6	4	4
2	3	4	1	3	1	1	3	2	4	2	4	5	4	3	2	4	4	4	3	3	4	2	3	4	3	3	5	5	4	1	1	4	5	3	5	4	4	5	6	5	2	1	4	1	1	4	4	3	4
2	3	4	2	2	1	2	1	1	1	1	3	3	3	3	3	3	3	3	3	1	1	1	3	3	1	3	1	3	1	7	7	1	1	7	1	1	7	1	1	2	6	5	3	4	4	3	2	2	2
2	2	2	2	2	1	1	3	3	2	1	3	3	3	3	3	3	3	3	3	3	3	3	3	3	3	3	3	3	5	4	4	5	4	3	4	3	6	1	2	3	4	3	6	3	4	5	2	4	0
1	2	2	2	2	1	1	1	1	1	1	4	5	4	4	3	5	5	2	3	2	4	5	4	3	4	3	5	3	5	3	3	3	5	5	3	2	4	4	4	3	3	5	4	5	5	4	5	2	2
1	2	2	2	2	1	1	1	1	1	1	4	5	4	4	3	5	5	2	3	2	4	5	4	3	4	3	5	3	5	5	5	3	5	3	3	2	4	4	4	3	5	3	4	3	3	4	5	2	2
2	3	4	1	1	1	1	2	2	2	3	5	5	5	3	4	3	4	4	4	3	4	3	2	3	4	4	5	5	5	2	2	5	4	1	4	5	4	5	5	7	4	1	5	3	2	3	4	2	2
2	1	1	2	2	1	2	1	1	1	1	3	1	1	1	1	4	2	3	1	1	1	1	1	2	5	1	4	1	6	3	4	5	2	5	2	7	5	5	2	2	5	7	4	5	2	1	2	1	2
1	1	2	4	3	1	1	1	3	3	1	1	5	4	1	1	5	3	2	1	1	1	1	4	1	1	2	3	3	4	2	2	3	5	2	7	2	1	3	3	2	6	6	3	3	2	4	3	2	3
1	2	2	2	3	1	1	1	1	1	2	4	2	2	4	2	5	2	2	2	3	3	3	2	1	5	4	3	4	7	3	4	2	3	4	2	2	3	3	6	2	3	5	2	5	2	4	3	1	2
1	1	2	2	2	1	1	1	1	1	1	4	4	1	2	3	5	5	2	1	1	4	5	5	5	5	3	2	2	1	2	1	2	1	2	1	2	1	2	1	2	1	2	1	2	1	2	1	1	2
2	1	1	3	3	1	1	1	1	1	1	5	4	4	5	1	5	4	2	1	1	4	5	5	5	4	4	5	5	5	4	4	2	7	7	1	7	4	5	4	5	6	1	3	7	4	7	7	1	4
1	2	2	2	3	2	2	3	3	1	5	5	5	5	5	3	5	5	5	5	5	5	5	5	3	5	4	5	5	4	1	1	3	5	1	1	1	2	4	1	2	2	2	2	2	1	1	5	4	4
2	1	2	3	2	1	2	2	1	2	2	5	5	5	5	1	5	5	5	2	1	5	4	5	2	5	5	2	5	6	6	7	2	6	5	7	6	5	5	3	2	2	2	5	5	4	4	5	3	2
1	2	2	2	3	2	2	3	3	1	5	5	5	5	5	3	5	5	5	5	5	5	5	5	3	5	4	5	5	4	7	7	3	5	7	1	1	6	4	1	2	6	6	2	6	7	7	5	4	0
2	2	3	1	2	1	2	2	1	5	2	2	2	2	2	1	1	2	2	1	1	1	1	2	1	4	2	4	2	7	2	3	2	6	4	5	2	3	6	4	5	4	7	7	7	1	5	7	2	3
2	2	2	1	2	1	1	3	2	5	3	3	1	1	5	5	3	3	3	3	3	3	3	3	3	3	3	3	3	3	5	5	3	3	6	3	3	5	3	3	3	5	5	3	5	5	5	3	1	4
2	2	4	2	2	1	1	1	1	1	2	1	1	3	1	1	3	1	4	1	1	4	1	1	2	4	3	4	4	6	4	3	3	3	5	2	3	4	3	4	2	6	5	4	7	5	4	3	1	4
2	1	2	1	2	2	1	3	2	3	3	2	1	2	3	3	2	3	3	2	1	2	1	2	1	2	1	1	2	2	6	6	2	2	5	2	3	6	4	3	2	5	6	3	5	5	5	2	2	3
1	1	2	3	2	2	1	1	1	1	1	4	4	2	2	2	1	4	5	2	1	1	2	2	2	2	4	4	5	3	5	6	5	4	4	3	4	6	4	7	5	4	6	5	7	1	4	6	1	1
2	3	3	2	3	1	2	1	1	2	1	2	5	4	2	4	4	2	1	5	4	2	4	4	4	4	2	4	5	6	4	1	6	5	4	3	4	1	6	6	5	2	2	4	6	2	2	6	1	2
2	3	4	3	2	1	2	2	2	2	3	4	2	4	4	4	4	3	4	3	3	4	4	4	2	4	4	4	5	5	2	3	5	5	3	4	4	3	6	5	6	4	5	4	5	3	4	5	3	2
2	2	2	1	2	1	1	3	2	5	3	3	1	1	5	5	3	3	3	3	3	3	3	3	3	3	3	3	3	3	3	3	3	3	2	3	3	3	3	3	3	3	3	3	3	3	3	3	1	0
1	1	1	2	2	1	1	3	1	3	2	4	5	5	5	5	5	4	3	3	3	3	3	5	5	5	5	5	5	4	1	1	4	3	5	3	3	5	3	3	3	5	6	3	2	5	5	3	3	3
2	2	4	2	2	1	1	1	1	1	2	1	1	3	1	1	3	1	4	1	1	4	1	1	2	4	3	4	4	6	4	5	3	3	3	2	3	4	3	4	2	2	3	4	1	3	4	3	1	0
2	2	3	1	2	1	2	2	1	5	2	2	2	2	2	1	1	2	2	1	1	1	1	2	1	4	2	4	2	7	6	5	2	6	4	5	2	5	6	4	5	4	1	7	1	7	3	7	2	1
2	3	3	3	3	1	1	1	1	1	1	4	1	1	1	1	4	4	2	1	1	1	1	1	1	1	1	4	4	5	6	7	7	6	6	7	6	4	7	7	6	6	2	7	5	6	3	6	2	1
1	3	3	2	2	1	1	1	1	1	1	2	5	5	4	4	4	3	5	4	3	4	4	4	3	5	5	5	5	4	2	2	5	7	2	2	4	1	2	4	1	6	4	2	2	6	3	2	2	3
2	1	1	1	1	2	1	4	3	1	4	2	3	1	1	1	4	3	5	1	1	3	3	2	1	5	5	4	5	6	2	3	5	5	2	3	2	3	6	5	5	4	5	2	6	3	3	5	2	3
2	2	3	3	2	1	1	1	1	1	1	4	2	4	4	4	1	4	5	1	1	1	5	5	4	5	5	4	1	4	2	1	6	6	1	2	2	6	7	7	6	2	1	5	6	1	3	7	3	3
1	1	1	1	3	1	1	1	1	2	1	2	2	3	2	1	1	3	4	3	1	3	1	2	4	1	1	4	3	4	5	4	2	2	7	2	7	5	4	4	3	5	3	5	3	1	5	3	2	3
2	3	3	3	3	1	1	1	1	1	1	4	1	1	1	1	4	4	2	1	1	1	1	1	1	1	1	4	4	5	2	1	7	6	2	7	6	4	7	7	6	2	6	7	3	2	5	6	2	3
2	2	3	2	3	1	1	1	1	1	1	5	5	5	5	4	5	5	5	4	5	5	5	5	4	5	4	5	5	1	1	2	3	2	1	1	2	5	1	2	3	5	2	3	2	4	4	5	2	4
2	1	3	2	1	2	2	1	2	1	1	3	4	1	2	2	2	3	1	1	2	2	1	3	2	1	1	5	2	5	6	3	4	4	2	3	3	5	2	4	3	5	5	3	4	4	4	3	3	3
1	2	2	2	3	1	1	1	1	4	2	1	1	1	1	1	1	1	1	1	1	1	1	1	1	1	1	1	1	6	5	3	2	7	4	5	2	4	6	7	6	4	7	6	5	5	6	6	1	2
1	2	2	2	1	1	2	1	1	1	1	4	5	4	4	5	5	5	5	3	2	3	3	2	4	5	3	5	5	6	7	7	4	4	3	5	4	7	4	5	6	3	3	6	4	6	6	4	3	1
1	1	1	2	3	1	1	2	1	3	2	5	5	5	4	3	4	5	3	2	1	1	2	1	2	4	3	4	2	2	4	5	4	4	1	2	2	6	3	4	3	6	6	4	6	5	6	4	2	2
1	2	2	4	3	1	2	1	1	1	1	4	4	3	3	2	2	4	4	4	3	3	2	3	5	3	4	3	4	6	4	2	5	6	5	4	4	2	5	6	5	5	3	4	5	2	1	5	2	2
1	1	1	2	3	1	1	2	2	3	1	4	5	5	5	4	5	5	5	2	4	5	5	2	4	5	3	5	5	5	2	6	6	3	5	5	2	5	3	5	3	5	3	5	3	3	3	5	2	1
1	2	2	2	1	1	2	1	1	1	1	4	5	4	4	5	5	5	5	3	2	3	3	2	4	5	3	5	5	6	1	1	4	4	5	5	4	1	4	5	6	5	5	6	4	2	2	4	3	3
1	2	2	2	3	1	1	1	1	4	2	1	1	1	1	1	1	1	1	1	1	1	1	1	1	1	1	1	1	6	3	5	2	7	4	5	2	4	6	7	6	4	1	6	3	3	2	6	1	2
2	2	3	2	3	1	1	1	1	1	1	5	5	5	5	4	5	5	5	4	5	5	5	5	4	5	4	5	5	1	7	6	3	2	7	1	2	3	1	2	3	3	6	3	6	4	4	5	2	0
2	1	2	2	2	1	2	1	1	1	2	4	4	4	3	2	2	2	2	2	1	1	2	2	2	2	2	1	2	3	3	1	3	2	4	3	3	3	5	4	4	3	3	3	5	2	3	4	2	3
2	3	3	2	2	1	2	1	1	1	1	4	2	1	1	2	4	1	2	1	1	1	1	1	2	1	2	2	1	4	6	2	7	5	4	7	6	2	6	6	6	2	2	6	6	4	4	4	1	2
1	2	2	2	1	1	2	2	1	1	2	1	2	2	1	1	1	1	1	1	1	1	1	1	1	1	1	1	2	1	6	7	1	1	7	1	1	5	5	2	2	5	6	3	5	6	6	4	1	3
2	3	3	1	2	1	1	3	2	2	1	4	4	2	3	3	4	2	2	3	2	4	3	2	3	4	3	2	4	2	5	5	4	4	4	4	3	5	4	3	4	5	5	3	4	5	5	3	1	2
2	1	1	2	3	1	1	1	1	1	1	4	1	1	1	1	1	2	1	1	1	1	1	1	1	1	2	1	2	5	2	1	5	6	2	5	5	2	4	6	5	2	1	7	2	1	1	6	1	3
2	3	3	2	2	1	1	1	1	1	1	2	3	3	2	2	1	2	1	1	2	2	2	2	2	2	2	2	2	2	6	4	4	6	5	6	4	4	6	6	6	4	5	6	6	6	4	6	2	2
2	1	2	2	2	1	2	1	1	1	1	4	4	4	3	4	3	4	5	2	3	4	2	2	4	1	2	4	4	5	5	3	5	5	3	5	4	4	4	4	4	4	5	4	4	4	5	4	2	2
2	1	1	3	3	1	2	1	1	1	1	5	2	2	1	3	5	5	1	1	1	2	5	1	2	5	5	5	3	1	5	2	2	2	1	1	5	7	6	7	1	1	1	3	1	1	2	5	1	3
2	1	1	2	4	1	2	1	1	1	1	2	2	1	1	1	1	2	4	1	1	1	1	1	1	2	3	4	5	6	1	6	5	6	1	6	6	1	6	6	5	1	1	6	1	1	2	6	1	3
2	3	3	2	2	2	2	1	1	1	3	2	2	2	2	2	5	3	3	3	3	3	1	3	1	4	3	4	3	6	5	5	2	2	2	1	1	2	3	2	2	4	5	2	5	5	2	3	1	1
2	2	2	1	1	1	1	1	1	1	1	1	1	1	1	1	2	1	1	1	1	1	1	1	1	1	1	1	1	7	5	4	5	7	4	4	4	6	7	7	5	3	7	7	6	7	7	7	1	3
1	1	2	2	3	1	1	1	1	1	1	4	3	1	3	2	4	3	2	1	2	1	3	3	1	3	1	2	2	2	5	5	5	3	7	2	2	4	3	2	2	7	7	3	7	7	6	4	0	3
1	2	2	2	1	1	2	2	1	1	2	1	2	2	1	1	1	1	1	1	1	1	1	1	1	1	1	1	2	1	2	1	1	1	1	1	1	3	5	2	2	3	2	3	3	2	2	4	1	1
1	1	1	3	3	2	2	4	2	4	3	3	3	2	1	1	3	2	1	1	1	1	1	2	1	1	1	2	3	2	5	5	2	2	5	2	3	4	4	3	3	6	6	6	4	2	4	3	2	3
1	2	2	2	2	1	1	1	1	1	1	4	4	2	1	1	4	4	4	1	1	4	1	1	1	4	4	4	1	4	3	3	4	5	2	5	5	4	5	5	5	4	1	5	1	3	4	5	1	2
1	1	1	1	1	1	2	1	1	5	2	1	3	3	3	3	3	3	3	1	1	3	3	3	3	3	3	3	3	4	5	4	3	4	5	4	4	7	7	4	4	4	4	4	7	4	4	4	0	2
2	2	2	2	1	1	1	1	1	1	1	2	2	1	1	1	2	1	2	1	1	1	1	1	1	2	1	2	2	5	6	3	5	6	6	6	5	6	6	4	5	6	6	6	4	4	6	6	1	3
2	2	2	2	1	1	1	1	1	1	1	2	2	1	1	1	2	1	2	1	1	1	1	1	1	2	1	2	2	5	2	5	5	6	2	6	5	2	6	4	5	2	2	6	4	4	2	6	1	1
1	2	2	2	2	1	1	1	1	1	1	4	4	2	1	1	4	4	4	1	1	4	1	1	1	4	4	4	1	4	5	5	4	5	6	5	5	4	5	5	5	4	7	5	7	5	4	5	1	2
2	2	2	1	1	2	2	2	1	3	2	5	5	5	4	3	5	5	3	3	3	4	5	3	4	4	5	5	5	7	4	1	3	6	4	5	1	1	4	7	4	2	2	3	5	3	3	4	2	3
2	2	3	1	1	1	1	1	1	1	1	4	4	2	1	1	4	3	1	1	1	1	1	1	1	4	4	4	4	5	3	3	4	5	5	5	5	5	5	4	3	4	5	3	5	3	5	5	2	3
2	1	1	4	4	1	1	1	1	2	1	4	2	1	2	3	2	2	1	4	2	2	3	3	2	1	3	4	4	3	5	4	3	2	2	5	3	3	5	6	3	2	2	3	3	3	2	2	2	3
2	2	3	1	1	1	1	1	1	1	1	4	4	2	1	1	4	3	1	1	1	1	1	1	1	4	4	4	4	5	5	5	4	5	3	5	5	3	5	4	3	4	3	3	3	5	3	5	2	1
1	3	3	2	3	1	1	1	1	1	1	2	5	1	2	1	2	1	5	1	1	1	1	1	1	1	2	5	1	7	6	3	7	7	6	7	3	7	2	1	2	7	7	1	6	6	7	1	0	4
2	3	5	4	4	1	1	1	1	1	1	3	1	1	1	1	2	2	1	1	1	1	1	1	1	1	1	2	2	2	6	5	3	4	6	3	2	6	4	5	4	5	6	6	6	5	6	4	2	3
2	1	1	2	1	1	1	1	1	1	1	4	4	3	5	1	5	5	3	1	1	2	1	1	3	2	4	4	5	4	4	6	2	2	7	1	3	6	3	5	3	5	3	2	3	3	4	3	2	1
2	1	1	2	1	1	1	1	1	1	1	4	4	3	5	1	5	5	3	1	1	2	1	1	3	2	4	4	5	2	1	6	6	5	3	6	5	1	6	6	5	2	2	5	2	2	2	5	2	1
2	1	2	3	3	2	1	1	1	2	1	3	3	3	1	2	2	1	2	1	1	3	1	1	1	1	4	4	4	4	6	6	4	4	6	4	4	4	2	1	4	5	6	4	7	5	7	4	0	2
1	3	4	2	2	1	2	1	1	1	1	4	4	4	5	2	5	5	2	2	1	1	2	1	1	5	1	4	2	6	3	2	4	7	1	4	4	2	6	5	7	1	7	5	7	3	5	6	0	2
2	1	1	3	3	2	2	1	1	1	2	2	4	2	1	1	1	2	3	1	1	4	1	2	3	2	2	2	2	6	7	5	5	2	6	5	4	6	5	5	5	6	6	4	6	6	6	5	0	1
1	1	1	1	1	1	1	1	1	1	1	5	4	3	1	1	3	2	5	1	1	4	2	2	2	4	3	4	4	6	2	4	5	6	2	4	5	3	5	6	6	2	3	6	2	5	3	6	0	2
2	3	3	2	2	1	1	1	1	3	1	4	5	1	1	1	3	2	1	1	1	1	1	1	2	1	1	3	4	6	7	5	5	4	4	4	5	6	7	7	6	7	7	6	6	7	6	6	1	2
1	1	2	2	2	2	2	2	1	4	4	5	5	2	3	1	1	4	2	1	1	2	1	1	4	5	5	5	5	2	6	3	7	6	2	1	6	7	3	4	1	4	1	7	5	7	3	1	2	1
1	1	1	3	3	1	1	1	1	1	1	4	1	1	1	1	2	1	5	1	1	5	1	1	1	1	1	5	5	7	7	1	1	1	7	1	1	7	1	1	1	7	7	1	7	7	7	1	0	4
1	1	1	1	2	1	1	1	2	2	1	4	2	1	1	1	2	1	2	1	1	2	1	1	2	4	2	2	2	2	7	3	1	2	7	2	3	7	2	1	2	6	7	7	7	7	7	2	0	3
1	1	2	2	1	1	2	3	3	3	4	4	4	1	1	3	4	4	4	1	1	1	1	2	2	1	5	4	2	6	6	4	6	6	7	7	7	5	7	7	7	7	7	7	7	7	7	7	1	2
1	2	2	2	2	1	1	1	1	1	1	4	4	2	1	1	1	2	1	1	1	1	1	2	2	1	1	2	3	6	7	3	6	6	7	4	6	6	7	7	6	6	7	6	6	7	7	6	0	1
2	1	2	3	2	1	2	1	1	1	1	1	1	1	1	3	4	4	3	2	5	5	5	4	3	3	4	4	5	2	7	7	1	1	6	1	1	6	1	1	1	7	7	1	7	7	7	1	0	3
2	3	5	2	2	2	2	1	1	1	1	4	4	3	2	1	2	4	2	1	2	2	2	1	2	4	4	2	2	1	6	4	4	2	4	4	4	7	5	5	5	7	7	5	6	7	3	4	3	3
2	3	3	1	2	1	1	2	1	1	2	4	3	2	1	2	1	2	3	1	2	2	2	2	1	3	4	4	3	2	4	3	4	5	6	4	2	5	5	4	4	6	7	3	4	4	6	4	1	3
2	1	2	2	2	2	2	1	1	1	1	3	2	3	4	3	4	3	2	3	2	3	4	3	2	3	2	2	1	3	5	5	5	6	5	3	6	2	3	6	3	5	5	4	2	3	5	6	2	3
2	3	3	4	4	1	1	1	2	1	2	3	5	2	1	1	3	2	3	2	2	3	2	2	2	2	2	2	2	4	4	5	4	4	5	4	5	3	7	7	7	2	1	6	2	1	2	6	0	1
2	1	1	3	4	1	2	1	1	1	1	4	3	2	1	1	2	4	2	2	2	2	2	2	2	2	2	2	4	2	7	4	4	3	5	3	4	6	5	5	5	6	7	5	7	7	7	5	0	2
2	1	1	3	3	2	2	1	2	1	2	4	4	4	2	2	1	2	3	1	1	3	1	3	1	4	2	4	5	2	2	4	4	1	6	2	3	4	3	6	5	4	5	3	2	2	3	6	1	4
2	1	1	2	3	1	1	1	1	1	2	2	4	1	2	1	1	2	1	1	3	1	2	1	2	2	4	5	5	6	2	3	7	7	1	6	7	3	7	7	7	2	1	6	1	1	1	7	2	3
1	1	3	2	2	2	1	1	1	1	1	3	2	1	2	1	1	2	1	2	1	1	2	1	2	3	2	1	2	3	7	7	4	4	7	6	5	7	5	4	5	7	5	2	5	3	5	4	0	1
1	1	1	2	1	2	2	1	1	3	4	2	3	2	3	3	2	2	3	3	4	3	2	2	4	5	5	1	1	2	6	5	3	3	6	2	2	6	4	4	3	5	5	4	4	4	5	4	2	4
1	2	1	2	1	1	1	1	1	1	1	4	3	4	3	2	2	3	3	2	2	4	2	2	3	4	3	4	3	5	6	6	3	5	6	4	4	5	4	4	4	4	5	1	6	5	6	5	0	2
2	3	3	3	3	1	1	1	1	1	1	2	3	2	1	2	1	2	4	2	2	5	2	2	1	2	2	2	2	4	5	2	3	5	6	5	4	4	4	4	3	4	7	4	6	5	3	6	2	2
1	3	4	2	2	1	1	1	1	1	1	1	2	2	1	1	2	1	1	1	1	1	1	1	1	1	1	1	2	5	7	2	5	6	5	5	5	5	6	5	6	2	5	4	7	6	5	7	0	2
1	2	1	2	1	1	1	1	1	1	1	4	3	4	3	2	2	3	3	2	2	4	2	2	3	4	3	4	3	5	2	2	3	5	2	4	4	3	4	4	4	4	3	1	2	3	2	5	0	2
2	1	2	2	2	1	1	2	1	2	1	4	1	1	1	1	4	2	2	1	1	4	2	4	4	4	4	4	2	3	2	2	4	5	3	3	2	3	4	3	3	2	1	3	1	2	1	4	1	0
1	1	2	1	3	1	1	1	1	1	1	1	5	1	1	1	2	1	1	1	2	1	1	1	1	2	1	1	2	5	2	7	4	3	2	7	7	5	4	7	4	2	3	4	1	3	3	5	0	1
2	1	1	2	2	2	1	1	1	2	1	5	5	5	5	5	5	5	5	5	1	3	5	5	5	5	5	5	5	4	5	4	7	7	7	3	3	7	5	5	5	3	6	5	5	7	7	3	0	4
2	3	4	3	3	1	1	1	1	1	1	4	2	2	1	1	2	2	1	1	2	1	1	2	1	2	1	2	2	6	7	3	7	7	7	2	5	6	7	6	6	6	7	6	6	7	6	6	0	1
1	1	2	1	2	1	2	2	2	1	1	4	4	2	4	2	5	4	1	2	1	2	1	1	2	5	2	4	5	3	4	4	1	3	1	1	4	7	6	5	1	2	1	6	5	4	1	5	1	0
2	1	2	1	1	2	2	1	2	1	1	1	1	2	2	3	2	2	3	1	2	1	2	1	1	1	1	1	1	3	1	4	5	3	1	7	7	7	5	5	3	4	4	4	1	2	2	4	3	1
2	1	2	2	2	1	2	1	1	1	1	2	3	1	1	1	1	1	1	1	1	1	1	1	1	2	1	1	1	2	7	6	4	5	2	3	7	6	4	7	5	2	4	7	7	4	7	7	0	3
1	2	2	2	2	1	1	1	1	1	1	4	4	2	1	1	1	2	1	1	1	1	1	2	2	1	1	2	3	6	1	5	6	6	1	4	6	2	7	7	6	2	1	6	2	1	1	6	0	3
1	3	3	2	2	2	1	2	1	1	1	4	3	3	1	1	1	1	1	1	1	1	1	1	1	1	1	3	1	6	1	1	6	6	1	6	6	6	6	6	6	2	6	6	1	1	1	6	0	0
1	3	3	1	3	1	1	1	1	1	1	2	2	1	1	1	1	2	2	1	1	1	2	1	2	2	1	2	2	7	1	3	2	2	4	3	6	5	7	7	2	1	2	5	2	1	5	7	0	1
1	2	2	2	2	1	2	1	1	2	2	1	1	1	1	1	1	1	2	1	1	1	1	1	2	1	1	1	1	6	7	2	5	6	6	4	6	6	6	7	5	4	7	6	6	5	6	7	0	1
1	2	3	2	2	1	2	1	2	1	1	4	5	3	5	5	5	4	5	4	5	4	5	5	3	5	5	5	5	1	7	7	1	1	1	1	1	7	1	1	1	7	4	3	7	7	7	1	4	4
2	3	3	2	3	1	1	1	1	1	1	5	5	5	5	4	4	3	4	5	5	4	5	5	5	5	5	5	5	5	4	7	2	6	1	6	7	7	7	4	4	1	2	3	1	2	5	7	2	0
1	2	3	2	2	1	2	1	2	1	1	4	5	3	5	5	5	4	5	4	5	4	5	5	3	5	5	5	5	1	1	1	1	1	7	1	1	1	1	1	1	1	4	3	1	1	1	1	4	0
1	1	1	1	1	1	2	3	4	2	3	3	5	3	4	4	5	3	3	3	3	4	5	3	4	5	3	4	3	4	6	7	5	7	2	3	7	3	1	4	3	5	3	2	1	4	2	4	4	0
1	1	1	3	2	1	1	3	3	5	4	3	4	3	2	2	4	3	1	1	1	1	1	1	1	4	4	5	5	7	5	4	3	6	6	5	3	4	5	6	4	5	5	4	6	3	6	6	4	2
2	1	2	1	5	5	2	1	1	1	1	4	3	1	3	1	5	2	2	1	3	1	2	1	1	3	2	1	1	5	1	4	4	4	6	5	3	3	3	3	2	6	6	2	6	6	6	2	2	4
2	3	4	2	1	1	1	1	1	1	1	3	4	4	4	1	2	1	4	1	1	2	2	1	1	4	4	5	5	6	2	7	7	7	6	7	7	2	7	7	7	2	1	6	1	2	1	7	0	0
2	3	4	2	1	1	2	1	1	1	2	5	5	5	5	5	5	5	5	1	1	5	5	5	5	5	5	5	5	2	1	1	2	1	1	1	4	1	2	2	2	7	2	1	1	1	7	2	4	4
1	2	3	2	3	1	1	1	1	1	1	5	4	3	3	2	4	4	4	3	3	3	4	1	1	4	2	5	2	4	4	1	4	4	1	7	7	1	4	5	5	3	3	5	7	7	4	3	1	3
2	2	2	1	3	1	2	3	1	4	3	2	3	2	4	3	4	1	1	4	1	1	3	3	5	5	5	3	5	1	7	7	7	7	7	7	5	1	3	3	3	3	6	3	4	4	5	7	4	0
2	1	1	2	4	1	1	1	1	1	1	5	5	5	5	4	5	5	5	5	1	5	5	4	5	5	5	5	1	2	2	2	3	3	3	3	4	7	2	5	3	5	7	7	7	1	4	5	3	3
1	1	1	2	2	2	2	3	3	5	2	3	4	4	1	1	5	3	3	3	3	4	3	2	3	4	3	2	3	4	4	2	5	3	4	6	4	5	4	6	4	2	7	4	3	1	2	2	2	1
2	2	2	1	3	1	2	3	1	4	3	2	3	2	4	3	4	1	1	4	1	1	3	3	5	5	5	3	5	1	1	1	7	7	1	7	5	7	3	3	3	5	2	3	4	4	3	7	4	4
1	2	3	2	3	1	1	1	1	1	1	5	4	3	3	2	4	4	4	3	3	3	4	1	1	4	2	5	2	4	4	7	4	4	7	7	7	7	4	5	5	5	5	5	1	1	4	3	1	1
2	1	2	1	2	2	2	1	1	1	1	1	2	1	1	1	5	3	4	1	1	1	1	1	1	4	3	5	4	5	2	2	7	6	1	2	3	7	7	2	1	6	7	2	2	4	5	5	4	2
2	2	2	4	2	1	1	1	1	1	1	4	3	2	4	2	4	4	4	2	2	4	4	2	2	4	4	5	5	5	3	4	4	5	4	2	4	4	4	3	4	5	5	3	5	4	3	5	3	3
2	3	3	2	1	1	1	3	3	5	3	3	2	1	1	1	3	2	1	1	1	1	1	1	1	2	3	4	5	2	4	6	4	2	4	6	3	6	7	4	5	6	5	5	7	4	4	6	1	4
2	2	2	4	2	1	1	1	1	1	1	4	3	2	4	2	4	4	4	2	2	4	4	2	2	4	4	5	5	5	5	4	4	5	4	2	4	4	4	3	4	3	3	3	3	4	5	5	3	1
1	3	3	4	4	1	1	5	1	1	1	2	1	1	5	1	1	1	1	3	2	3	2	4	2	1	2	3	2	7	7	1	7	7	2	7	4	7	7	7	7	1	3	6	5	3	4	4	0	1
2	2	3	2	1	1	1	1	1	1	1	4	2	2	3	4	5	4	2	1	1	1	3	1	1	4	1	1	1	5	2	4	4	7	1	7	6	7	7	7	6	5	7	6	7	3	6	7	1	1
2	2	3	2	1	1	1	1	1	1	1	4	2	2	3	4	5	4	2	1	1	1	3	1	1	4	1	1	1	5	6	4	4	7	7	7	6	1	7	7	6	3	1	6	1	5	2	7	1	3
2	1	1	2	3	1	1	1	1	1	1	5	2	1	1	5	4	4	1	1	1	1	1	1	1	1	1	1	5	5	5	3	3	5	3	5	4	7	1	1	1	7	7	1	7	7	7	1	2	2
1	1	1	2	3	1	2	4	5	3	4	5	5	5	3	3	5	5	5	5	2	5	4	3	5	5	5	5	4	5	2	7	4	3	2	7	7	5	4	7	4	2	3	4	1	3	3	5	2	3
2	1	1	1	1	1	1	1	1	1	1	4	1	1	1	1	1	1	2	1	1	1	1	1	2	1	1	2	2	2	2	3	4	7	5	6	7	2	6	7	5	4	1	5	5	4	4	6	2	1
1	1	1	1	1	2	1	2	2	1	2	3	2	2	1	1	5	5	2	1	1	2	2	2	5	1	2	5	4	3	4	5	6	4	1	4	2	7	1	1	1	1	2	7	2	2	3	1	1	2
1	2	4	1	4	1	1	1	1	2	1	4	2	2	2	3	2	3	2	2	1	1	2	4	1	1	4	2	2	4	4	3	4	4	5	4	3	7	7	1	1	7	5	3	1	1	5	3	2	3
1	2	4	1	4	1	1	1	1	2	1	4	2	2	2	3	2	3	2	2	1	1	2	4	1	1	4	2	2	4	4	5	4	4	3	4	3	1	7	1	1	1	3	3	7	7	3	3	2	1
1	1	1	2	2	1	2	1	1	1	1	1	1	1	1	1	1	1	1	1	1	1	2	1	2	1	2	2	4	5	6	7	2	7	5	1	3	7	5	2	6	7	4	3	5	5	7	6	0	2
2	1	2	1	2	1	2	1	1	1	1	5	5	1	1	1	1	3	1	1	1	5	1	1	1	1	1	1	1	5	3	1	2	2	1	3	2	1	3	6	1	5	1	3	4	3	5	3	2	4
2	1	1	2	4	1	2	2	2	1	2	4	3	4	5	3	5	4	5	4	5	5	5	4	4	5	4	5	5	3	2	2	3	2	5	1	2	2	4	5	2	3	4	3	4	6	3	3	3	3
1	3	3	2	2	2	2	2	1	5	2	3	1	1	1	1	4	1	3	1	1	1	1	1	1	1	3	3	3	4	4	4	1	3	5	2	2	5	3	2	2	5	7	3	3	3	5	3	3	4
2	3	3	1	1	1	1	3	3	3	3	5	5	5	5	5	5	5	1	5	5	5	5	5	5	5	5	5	5	6	2	2	6	6	2	3	1	2	4	2	5	3	6	2	2	4	4	4	2	4
2	3	3	2	2	1	1	1	1	1	1	4	4	4	4	4	4	4	4	4	4	4	4	4	4	4	4	4	4	1	6	6	2	1	7	1	1	7	1	1	1	7	7	1	7	7	7	1	0	3
2	3	3	2	2	1	1	2	4	4	4	3	4	4	4	4	4	4	4	4	4	3	4	4	3	3	4	4	4	1	3	4	4	3	5	4	4	4	4	4	3	4	4	4	3	5	5	3	0	3
2	2	2	4	3	1	1	1	1	1	1	2	3	3	5	3	5	5	2	3	3	4	4	5	4	4	3	5	4	2	6	7	3	2	5	3	3	7	2	3	2	5	6	3	6	5	5	2	2	2
1	2	3	1	1	2	1	2	3	3	3	2	3	1	1	1	4	4	4	2	1	1	2	3	2	4	3	4	1	4	6	4	4	4	6	1	3	7	3	2	2	6	5	2	6	3	1	3	1	3
2	3	5	1	1	2	2	1	1	1	1	2	2	3	1	2	2	2	2	1	1	2	1	2	1	1	2	2	2	5	3	3	5	5	4	4	4	5	4	4	3	5	4	4	5	4	4	3	1	2
1	2	4	2	1	2	1	1	1	1	1	2	2	2	2	2	2	2	2	2	2	2	2	2	2	2	2	2	2	6	3	3	4	6	4	6	6	5	6	6	6	5	2	6	2	4	3	6	0	2
2	3	3	1	3	2	1	1	1	1	2	4	3	2	1	1	1	1	3	1	1	2	1	1	3	1	3	3	2	4	4	4	5	4	4	3	3	5	4	6	4	3	5	6	6	4	4	5	2	3
1	2	2	2	2	1	1	1	1	1	1	5	5	2	4	4	5	5	5	3	3	2	3	1	2	5	3	5	2	7	1	4	4	7	3	3	3	2	4	7	7	1	1	7	7	1	4	7	1	3
1	3	4	2	2	1	1	1	1	1	1	2	3	4	3	3	4	2	3	4	4	3	4	1	2	4	2	3	2	6	4	1	3	3	2	4	3	2	4	5	4	5	2	6	5	2	5	4	4	3
2	2	2	2	2	1	1	1	1	2	2	1	1	1	1	1	1	0	1	1	1	1	1	1	1	1	1	1	4	5	1	1	5	5	5	5	5	5	5	5	5	5	5	5	5	5	5	5	3	2
2	2	2	3	2	2	1	2	2	2	2	3	2	3	2	2	3	4	4	2	2	3	2	2	2	2	3	2	2	4	4	4	4	5	2	4	5	3	4	4	2	4	6	3	4	4	6	4	3	3
1	2	2	2	3	1	1	1	1	1	1	2	4	4	4	3	5	2	4	3	5	4	3	5	3	5	5	5	5	6	3	2	4	3	5	5	5	4	5	3	3	4	4	4	4	4	4	4	2	3
2	3	4	1	1	1	1	1	1	1	1	4	4	2	1	1	5	1	1	1	1	3	1	1	1	1	1	3	5	6	6	4	7	1	1	4	5	6	5	5	5	5	1	5	1	1	1	7	2	2
2	2	2	3	2	2	1	2	2	2	2	3	2	3	2	2	3	4	4	2	2	3	2	2	2	2	3	2	2	4	4	4	4	5	6	4	5	5	4	4	2	4	2	3	4	4	2	4	3	1
1	2	2	2	3	1	1	1	1	1	1	2	4	4	4	3	5	2	4	3	5	4	3	5	3	5	5	5	5	6	5	6	4	3	3	5	5	4	5	3	3	4	4	4	4	4	4	4	2	1
2	2	2	2	2	1	1	1	1	2	2	1	1	1	1	1	1	0	1	1	1	1	1	1	1	1	1	1	4	5	7	7	5	5	3	5	5	3	5	5	5	3	3	5	3	3	3	5	3	2
1	2	2	2	2	1	1	1	1	1	1	5	5	2	4	4	5	5	5	3	3	2	3	1	2	5	3	5	2	7	7	4	4	7	5	3	3	6	4	7	7	7	7	7	1	7	4	7	1	1
1	2	4	2	1	2	1	1	1	1	1	2	2	2	2	2	2	2	2	2	2	2	2	2	2	2	2	2	2	6	5	5	4	6	4	6	6	3	6	6	6	3	6	6	6	4	5	6	0	2
2	2	2	4	3	1	1	1	1	1	1	2	3	3	5	3	5	5	2	3	3	4	4	5	4	4	3	5	4	2	2	1	3	2	3	3	3	1	2	3	2	3	2	3	2	3	3	2	2	2
2	3	4	3	3	2	2	2	2	3	2	5	5	4	4	2	5	5	5	4	2	4	2	1	2	5	5	5	5	7	5	4	4	7	2	3	2	2	7	6	6	7	2	3	2	6	7	6	3	1
2	1	1	2	2	2	2	1	1	2	2	4	3	1	1	1	4	4	3	1	3	1	1	1	2	2	2	2	2	7	1	4	3	3	1	3	1	1	7	6	7	5	2	7	1	1	1	5	1	2
2	1	2	2	2	1	1	1	1	1	1	4	1	2	2	1	2	4	5	1	1	5	2	1	2	4	4	5	2	6	1	6	5	6	1	6	6	1	6	6	5	1	1	6	1	1	2	6	2	0
2	1	1	1	1	1	1	1	1	1	1	5	3	4	1	1	4	5	4	1	1	1	1	1	1	1	2	5	5	3	6	4	6	7	7	3	1	6	4	3	5	5	5	2	6	2	2	6	2	2
2	2	3	4	2	1	2	1	1	1	1	2	2	2	2	2	2	2	2	2	2	2	2	2	2	2	2	2	2	4	5	4	4	6	5	4	4	4	4	5	5	4	6	5	5	5	5	5	1	3
1	1	3	2	2	2	1	1	1	1	1	4	4	1	1	5	5	5	5	1	1	5	1	4	2	5	5	5	5	1	2	3	3	2	7	2	6	6	7	5	5	6	1	1	5	3	3	7	2	4
2	3	5	1	1	2	2	1	1	2	1	4	5	5	5	4	4	4	5	3	4	5	4	5	5	5	4	5	5	4	2	3	4	5	4	5	3	5	7	6	4	3	4	5	2	1	2	5	1	3
2	2	2	3	4	1	1	1	1	1	1	2	1	4	2	1	4	3	1	1	1	1	2	1	2	2	1	4	4	4	4	4	4	6	6	5	6	7	4	4	2	7	6	3	7	5	5	5	2	3
1	2	3	1	3	1	1	1	1	5	3	2	5	1	1	1	2	2	2	1	2	5	1	1	1	2	1	2	1	2	7	1	6	7	7	7	3	4	7	7	6	4	5	7	7	3	6	6	2	3
2	1	1	2	2	2	2	1	1	1	1	4	4	4	2	2	2	4	4	2	2	2	2	2	2	2	4	4	4	5	7	3	2	6	5	6	2	2	5	2	3	6	6	2	6	2	2	2	2	2
1	2	3	1	3	1	1	1	1	5	3	2	5	1	1	1	2	2	2	1	2	5	1	1	1	2	1	2	1	2	1	7	6	7	1	7	3	4	7	7	6	4	3	7	1	5	2	6	2	1
1	1	1	1	1	1	1	1	3	1	4	5	5	2	2	2	1	4	4	2	2	1	2	2	2	1	3	1	4	4	1	3	5	4	2	4	3	1	2	3	5	4	4	4	3	3	2	5	1	0
2	2	2	3	4	1	1	1	1	1	1	2	1	4	2	1	4	3	1	1	1	1	2	1	2	2	1	4	4	4	4	4	4	6	2	5	6	1	4	4	2	1	2	3	1	3	3	5	2	1
1	1	2	2	2	1	1	3	2	1	4	2	2	3	5	5	4	5	5	2	2	1	1	1	2	3	2	2	5	2	2	4	3	2	1	4	3	2	2	3	2	5	7	2	4	3	4	2	1	0
2	2	3	4	2	1	2	1	1	1	1	2	2	2	2	2	2	2	2	2	2	2	2	2	2	2	2	2	2	4	3	4	4	6	3	4	4	4	4	5	5	4	2	5	3	3	3	5	1	1
2	1	1	2	2	1	1	2	1	1	1	5	4	4	1	3	4	5	2	1	3	4	4	2	4	5	4	5	5	2	2	4	4	1	6	2	3	4	3	6	5	4	5	3	2	2	3	6	2	2
2	1	2	2	3	1	2	1	1	1	1	3	2	1	1	1	2	2	5	1	1	2	1	1	1	1	1	2	1	3	2	2	4	5	3	3	2	3	4	3	3	2	1	3	1	2	1	4	3	1
2	1	1	3	1	2	2	1	1	1	1	5	5	5	2	2	5	5	5	3	4	4	4	5	4	5	5	5	5	1	1	5	1	4	1	6	1	3	4	6	1	1	1	4	1	1	1	1	2	1
1	3	3	3	2	2	1	1	1	1	1	1	1	1	1	1	2	2	3	3	2	2	2	1	1	1	1	1	1	5	5	5	3	3	2	2	2	3	2	2	4	4	2	5	2	4	2	4	3	1
1	1	1	2	4	1	1	1	1	1	2	3	1	1	1	4	4	1	2	1	3	2	1	1	2	4	4	4	2	7	7	2	7	7	1	7	6	7	7	5	6	1	7	5	1	1	1	7	0	2
1	2	3	2	2	1	1	2	2	1	3	5	5	5	5	5	5	5	5	2	3	5	1	5	3	4	5	5	5	2	5	4	6	3	6	7	7	1	7	7	7	1	1	7	5	7	1	7	0	4
2	1	1	2	2	1	1	1	2	1	1	4	5	5	5	5	2	1	3	3	5	1	5	5	4	5	5	5	5	7	5	4	4	6	7	6	4	6	5	7	4	2	7	7	7	5	6	7	1	3
2	2	3	2	2	1	1	4	3	5	5	4	1	2	1	1	1	1	2	1	1	1	2	1	2	3	1	1	2	3	6	4	3	7	6	3	2	7	3	3	3	6	6	3	6	4	4	5	2	1
2	1	1	2	2	1	1	1	1	2	1	3	3	4	1	2	4	5	1	1	2	1	3	5	1	2	1	1	4	6	3	6	2	2	7	1	3	6	3	5	3	5	3	2	3	3	4	3	1	1
1	2	3	2	2	1	1	2	2	1	3	5	5	5	5	5	5	5	5	2	3	5	1	5	3	4	5	5	5	2	3	4	6	3	2	7	7	7	7	7	7	7	7	7	3	1	7	7	0	0
2	1	2	2	2	2	2	1	2	2	1	4	4	5	1	1	4	4	5	1	3	5	1	4	2	4	3	5	5	3	2	4	2	3	6	1	3	5	7	7	2	1	7	4	1	1	1	3	1	3
2	2	3	2	3	1	2	1	1	1	1	4	3	1	2	3	2	2	4	5	4	3	5	4	3	5	2	2	4	1	7	6	3	2	4	2	3	6	3	4	3	6	3	3	6	4	5	2	2	4
2	2	3	2	3	1	2	1	1	1	1	4	3	1	2	3	2	2	4	5	4	3	5	4	3	5	2	2	4	1	1	2	3	2	4	2	3	2	3	4	3	2	5	3	2	4	3	2	2	0
2	1	1	4	3	1	2	1	1	1	1	2	3	2	3	3	2	4	5	3	3	5	3	4	3	2	4	5	4	3	6	6	3	6	5	1	3	5	2	3	2	6	6	2	6	6	6	2	2	2
1	1	2	1	2	1	2	1	1	1	1	1	5	1	4	4	5	3	4	2	4	3	5	2	1	1	1	5	3	5	1	1	4	1	1	1	6	6	4	1	4	1	1	7	1	1	1	7	1	0
1	2	2	3	2	2	1	1	1	1	1	4	5	3	2	1	4	1	2	1	2	1	1	2	1	2	4	1	5	7	7	7	4	1	6	1	7	1	7	7	7	1	1	7	1	1	1	7	1	2
2	3	4	2	2	2	2	1	2	1	3	1	2	1	3	2	1	4	2	3	1	2	3	2	3	1	2	3	2	2	5	4	3	4	1	4	2	5	4	5	1	7	5	1	7	7	5	1	0	4
1	1	3	2	2	2	2	3	3	3	4	2	4	1	1	1	2	1	3	2	1	4	1	1	1	1	2	4	5	6	3	1	6	6	6	4	7	3	7	7	5	7	7	7	7	3	3	5	2	3
2	1	2	2	2	1	1	1	1	2	3	4	4	3	1	1	2	4	5	1	1	3	1	1	2	3	2	4	3	6	1	4	4	2	4	4	2	6	4	5	2	5	3	2	6	2	4	6	4	3
1	2	1	2	1	1	1	1	1	1	1	3	3	3	3	3	3	3	3	3	3	3	3	3	3	3	3	3	3	1	7	7	1	1	7	1	1	7	1	1	1	7	7	1	7	7	7	1	2	2
1	2	1	2	1	1	1	1	1	1	1	3	3	3	3	3	3	3	3	3	3	3	3	3	3	3	3	3	3	1	1	1	1	1	1	1	1	1	1	1	1	1	1	1	1	1	1	1	2	2
2	1	1	2	1	1	1	2	2	1	1	4	3	1	1	1	1	3	1	1	1	1	1	1	1	1	1	1	3	5	6	7	5	6	5	2	6	5	7	6	2	3	1	6	1	6	1	6	2	2
2	3	4	3	2	1	1	1	1	1	1	4	3	1	1	1	2	1	2	1	1	2	1	1	2	1	2	2	2	6	4	4	4	5	6	4	4	4	5	5	5	4	5	4	5	4	5	5	1	2
2	3	3	3	2	1	1	1	1	1	1	3	3	1	1	2	4	1	1	1	1	1	1	1	1	1	1	4	4	2	1	4	5	6	2	6	6	1	6	1	3	2	1	6	1	1	1	1	2	1
1	1	2	3	3	1	2	1	1	1	1	4	3	1	1	1	2	1	3	1	1	3	1	1	1	1	2	5	4	6	7	7	5	7	6	4	7	7	5	6	6	6	7	6	7	6	5	5	0	4
2	1	2	3	3	2	2	1	1	2	2	2	2	1	1	1	2	1	2	1	1	1	1	1	1	2	1	2	1	6	6	3	6	5	2	6	6	5	6	6	6	6	2	6	6	6	6	5	1	2
2	1	2	2	2	2	2	1	1	1	1	3	4	2	1	1	2	2	4	1	1	1	1	1	1	1	1	1	1	6	6	5	6	6	6	5	6	3	6	6	6	6	6	7	6	3	6	6	2	3
1	3	4	1	4	1	1	1	1	1	1	2	2	2	2	2	2	2	2	2	2	2	2	2	4	2	2	4	4	6	2	5	5	5	2	6	6	5	6	2	2	2	5	3	5	5	1	5	2	1
1	2	2	3	2	2	1	1	1	1	1	4	5	3	2	1	4	1	2	1	2	1	1	2	1	2	4	1	5	7	1	1	4	1	2	1	7	7	7	7	7	7	7	7	7	7	7	7	1	2
2	1	1	2	3	1	2	1	1	1	1	5	4	3	3	3	3	4	5	4	3	3	3	3	3	3	4	3	3	1	1	1	7	7	1	7	7	1	7	7	7	7	2	6	2	4	5	1	0	2
1	1	1	2	3	1	1	3	2	5	2	3	5	5	3	3	3	5	5	3	3	3	3	3	3	5	3	5	3	2	3	3	3	6	4	2	7	1	2	5	3	4	5	5	5	4	1	5	2	4
2	1	1	2	2	1	1	1	1	1	1	4	4	4	4	1	1	4	3	1	1	1	1	1	4	1	4	4	4	5	3	3	5	5	7	4	5	5	5	5	5	3	3	5	3	3	3	5	1	3
1	1	2	2	2	1	1	3	3	1	2	4	3	4	3	4	5	4	5	2	5	3	3	5	5	1	5	5	5	5	2	6	6	3	5	5	2	5	3	5	3	5	3	5	3	3	3	5	4	2
2	1	1	3	3	1	2	1	1	1	1	4	4	4	4	4	4	4	4	5	5	5	5	5	5	5	4	5	5	1	2	1	1	3	4	1	1	3	1	1	1	1	5	1	5	3	5	1	3	4
2	1	2	4	4	2	1	1	1	1	1	2	3	5	3	3	3	3	3	3	3	3	3	3	3	3	3	3	3	3	5	5	3	3	5	3	4	1	3	4	3	4	4	4	4	4	4	4	3	3
1	2	2	1	2	1	1	3	2	2	4	4	4	4	1	1	5	4	4	2	2	1	1	1	1	4	3	5	4	7	4	4	4	3	7	5	4	5	4	4	4	5	4	2	5	5	4	4	3	3
2	3	3	3	3	1	2	1	1	1	1	5	1	1	5	1	5	5	5	5	1	5	1	1	1	5	5	5	5	3	4	1	1	4	6	1	4	7	1	1	1	4	4	1	2	1	1	3	4	3
2	3	3	3	2	1	1	1	1	1	1	3	2	1	2	1	5	4	3	1	1	4	1	1	1	3	3	5	5	4	4	3	3	4	5	3	1	7	4	3	4	4	7	3	7	4	4	4	2	3
2	2	2	2	1	2	2	1	1	3	1	2	3	1	1	1	1	1	1	1	1	1	1	1	1	1	1	1	1	4	6	4	4	5	6	3	4	5	4	3	3	5	4	4	6	5	5	5	1	2
2	1	2	3	2	2	2	1	1	1	1	2	2	2	2	2	2	2	4	1	1	3	3	3	3	3	3	3	3	6	5	5	3	3	5	3	3	5	3	3	3	5	5	3	5	5	5	3	1	3
2	2	2	1	1	1	1	1	1	1	1	4	4	4	4	4	4	4	4	4	3	3	3	3	3	4	3	3	4	6	4	4	3	5	4	4	3	5	6	6	6	4	4	4	4	4	4	4	1	3
2	2	3	3	4	1	1	1	1	1	1	5	4	4	4	2	1	2	1	1	1	1	1	1	1	1	1	1	3	2	2	2	2	6	2	1	7	5	7	3	3	4	1	3	3	4	3	4	1	1
2	1	2	1	2	2	2	2	2	1	1	3	4	1	1	1	4	1	1	1	1	1	1	1	1	1	4	4	4	4	4	4	5	5	4	3	6	5	5	6	4	3	3	4	3	5	3	4	2	2
2	2	2	2	2	1	1	2	2	2	1	1	1	2	1	3	4	4	1	1	1	1	1	1	1	1	1	1	1	4	3	6	7	6	3	4	3	4	3	4	3	3	3	4	2	4	6	3	1	2
1	2	3	1	1	1	1	1	1	1	1	1	5	2	3	4	4	4	3	2	3	4	3	4	2	3	4	3	5	7	1	2	3	6	5	6	2	2	2	3	2	1	1	2	2	1	2	7	0	2
2	3	4	1	1	1	1	1	1	1	2	2	5	1	1	1	2	1	1	2	1	1	1	1	1	1	1	1	1	2	4	3	3	2	7	6	3	5	6	6	6	4	6	6	7	4	5	3	1	2
2	3	3	3	3	1	1	1	1	1	1	2	1	1	1	1	1	1	1	1	1	1	1	1	1	1	1	2	4	4	7	7	4	4	7	4	5	7	7	4	4	7	7	5	7	7	7	6	1	3
1	1	3	1	1	1	2	1	1	1	1	4	4	4	3	3	3	4	3	4	3	5	3	3	4	5	3	3	5	7	6	1	3	6	6	4	1	6	2	3	6	1	5	6	7	1	1	7	0	4
2	1	1	4	4	1	1	1	1	1	1	2	1	1	1	1	1	1	4	1	1	4	1	2	2	4	3	4	3	6	3	3	5	6	6	2	7	3	5	7	5	6	3	2	5	6	6	7	2	3
2	2	2	2	2	1	1	1	1	1	1	5	4	1	1	1	3	2	1	1	1	1	1	4	1	2	2	5	5	6	2	1	6	7	4	5	7	1	7	7	7	2	7	7	7	2	1	7	3	3
2	1	2	2	2	1	1	1	1	1	1	2	4	2	2	2	2	1	3	1	1	2	1	1	1	1	2	1	2	4	5	1	6	7	5	4	5	6	4	7	5	3	3	6	6	2	2	4	2	2
1	2	2	2	1	1	2	1	1	1	1	4	4	2	2	2	2	4	4	2	2	3	2	2	2	2	4	4	4	4	4	4	3	3	6	4	5	4	2	2	2	6	6	4	4	4	4	2	2	2
2	1	2	1	1	1	1	1	1	1	1	2	4	1	1	2	1	1	1	2	2	1	2	3	2	4	1	3	3	6	2	3	2	4	2	2	6	2	7	7	6	2	2	5	3	4	5	4	2	1
2	1	2	2	2	1	1	1	1	2	2	4	5	2	3	2	3	3	2	1	1	2	1	1	1	4	2	3	2	7	3	2	3	5	3	3	2	1	2	6	2	1	3	7	2	1	1	3	2	3
2	3	3	2	2	1	1	1	1	2	2	4	4	4	4	4	4	4	4	4	4	4	4	4	4	4	4	4	4	4	6	6	5	5	5	4	4	4	4	4	4	5	6	4	6	4	5	4	1	2
1	2	2	2	2	2	2	2	2	2	2	4	4	4	2	2	4	4	4	2	2	4	2	2	4	4	2	2	2	5	5	4	4	6	5	4	4	5	5	4	4	4	5	4	6	5	4	5	2	2
1	2	3	2	4	2	2	2	2	2	2	3	3	3	3	3	5	3	3	3	4	4	4	4	4	4	3	5	4	4	4	4	4	4	4	4	4	4	5	4	4	4	4	4	5	4	4	4	2	2
1	2	2	2	2	1	2	1	1	1	1	2	4	1	2	2	1	3	3	1	1	4	2	2	2	2	2	2	2	4	6	6	5	6	3	3	3	5	6	6	3	5	5	6	5	5	2	6	1	1
1	2	3	2	4	2	2	2	2	2	2	3	3	3	3	3	5	3	3	3	4	4	4	4	4	4	3	5	4	4	4	4	4	4	4	4	4	4	5	4	4	4	4	4	3	4	4	4	2	2
1	2	2	2	2	1	2	1	1	1	1	2	4	1	2	2	1	3	3	1	1	4	2	2	2	2	2	2	2	4	2	2	5	6	5	3	3	3	6	6	3	3	3	6	3	3	6	6	1	3
1	2	2	2	2	2	2	2	2	2	2	4	4	4	2	2	4	4	4	2	2	4	2	2	4	4	2	2	2	5	3	4	4	6	3	4	4	3	5	4	4	4	3	4	2	3	4	5	2	2
2	1	1	2	2	1	1	1	1	1	1	4	4	3	2	2	1	4	3	1	3	2	1	2	2	3	5	4	4	7	1	4	3	3	1	3	1	1	7	6	7	5	2	7	1	1	1	5	1	2
1	2	2	2	1	1	2	1	1	1	1	4	4	2	2	2	2	4	4	2	2	3	2	2	2	2	4	4	4	4	4	4	3	3	2	4	5	4	2	2	2	2	2	4	4	4	4	2	2	2
1	3	4	3	2	1	1	5	5	4	3	3	2	4	3	4	3	3	4	4	2	3	4	4	3	3	2	2	5	4	6	5	5	4	4	4	3	5	2	4	3	4	5	4	4	5	4	5	1	1
1	3	3	2	2	1	1	1	1	1	1	4	4	2	2	1	1	1	2	1	2	4	1	1	2	1	2	2	2	4	4	4	4	3	3	4	3	4	4	4	3	3	3	3	3	4	3	4	1	1
2	1	2	4	3	1	2	1	1	1	1	5	5	5	5	5	5	5	5	1	1	5	5	1	1	5	5	5	5	5	2	4	3	6	3	3	3	5	6	2	3	3	3	3	2	5	6	5	2	1
1	1	2	4	4	2	1	1	1	1	1	1	5	4	1	1	1	1	5	3	1	1	1	1	5	1	1	1	1	3	7	5	7	6	7	1	1	7	6	7	4	4	4	4	4	4	4	4	1	3
1	1	2	3	3	1	1	1	1	1	1	4	3	1	1	2	2	3	2	1	1	1	2	2	2	4	3	4	4	5	2	6	5	2	5	2	5	5	7	3	4	2	2	6	2	3	1	7	0	0
1	3	3	2	2	1	1	1	1	2	1	4	5	4	2	4	4	5	2	2	2	1	2	4	2	2	4	2	5	1	7	6	3	2	5	5	5	3	6	6	3	4	2	2	6	5	5	6	2	2
2	1	3	2	2	1	1	2	1	1	1	2	1	1	1	1	1	1	1	1	1	1	1	1	1	1	1	1	1	2	3	3	6	2	3	5	2	3	6	6	5	6	3	2	5	6	6	1	2	3
2	2	2	2	2	1	1	2	2	2	1	1	1	2	1	3	4	4	1	1	1	1	1	1	1	1	1	1	1	4	5	2	7	6	5	4	3	4	3	4	3	5	5	4	6	4	2	3	1	2
2	1	1	2	2	1	1	1	1	1	1	4	2	1	1	2	2	2	2	2	2	2	2	2	2	2	2	2	2	5	6	6	5	5	6	6	5	6	6	6	6	6	6	6	6	6	6	6	1	2
1	2	3	1	1	1	1	1	1	1	1	1	5	2	3	4	4	4	3	2	3	4	3	4	2	3	4	3	5	7	7	6	3	6	3	6	2	6	2	3	2	7	7	2	6	7	6	7	0	2
1	1	1	3	4	1	1	1	1	1	1	3	3	3	3	3	3	4	3	4	1	1	4	1	1	3	3	3	3	6	5	5	5	6	7	5	5	3	5	5	5	2	6	6	7	5	5	6	1	1
1	1	1	4	3	1	1	1	1	2	1	3	2	2	3	2	3	4	4	2	2	3	2	1	3	3	3	4	4	4	6	3	4	4	5	3	4	6	4	4	4	4	4	4	4	4	4	4	1	2
1	1	2	2	4	1	1	1	1	1	1	2	2	1	1	1	1	1	1	1	1	1	1	1	1	1	1	1	1	5	6	5	6	6	6	6	6	2	6	6	5	3	7	6	6	6	6	6	1	1
2	2	3	3	4	1	1	1	1	1	1	5	4	4	4	2	1	2	1	1	1	1	1	1	1	1	1	1	3	2	6	6	2	6	6	1	7	3	7	3	3	4	7	3	5	4	5	4	1	3
2	2	2	1	1	1	1	1	1	1	1	4	4	4	4	4	4	4	4	4	3	3	3	3	3	4	3	3	4	6	4	4	3	5	4	4	3	3	6	6	6	4	4	4	4	4	4	4	1	1
2	2	2	2	1	2	2	1	1	3	1	2	3	1	1	1	1	1	1	1	1	1	1	1	1	1	1	1	1	4	2	4	4	5	2	3	4	3	4	3	3	3	4	4	2	3	3	5	1	2
2	3	3	2	1	1	1	1	1	1	1	4	4	2	2	2	4	3	3	3	3	3	3	3	2	4	2	5	5	5	5	3	4	5	1	3	2	4	5	4	4	4	3	5	2	2	4	6	1	1
1	1	1	2	3	1	1	2	3	2	2	5	4	4	3	1	5	5	4	1	1	1	4	5	5	5	4	1	4	2	3	2	6	5	6	2	2	4	5	3	5	5	4	2	5	5	4	5	2	1
1	2	2	1	2	1	1	3	2	2	4	4	4	4	1	1	5	4	4	2	2	1	1	1	1	4	3	5	4	7	4	4	4	3	1	5	4	3	4	4	4	3	4	2	3	3	4	4	3	1
2	3	3	2	2	1	1	1	1	1	1	5	4	5	4	2	3	2	4	4	2	2	2	2	2	4	4	5	5	4	3	5	5	5	5	5	5	5	4	4	5	3	3	5	3	3	3	5	1	0
2	3	3	3	1	2	1	1	3	3	2	5	5	5	5	5	5	5	5	4	4	4	5	4	3	5	4	5	5	6	5	6	3	6	6	2	2	4	4	4	4	5	6	4	2	6	4	5	2	1
1	1	2	1	1	1	2	1	1	2	2	4	4	4	2	3	3	3	3	2	3	2	2	2	2	2	1	2	2	3	6	5	2	3	6	3	3	6	3	4	2	5	5	3	6	6	6	3	1	2
2	1	1	2	1	1	1	1	1	1	1	3	5	1	1	1	1	2	1	1	1	1	5	1	5	1	1	1	5	2	7	6	4	4	7	5	4	3	2	1	1	7	7	1	7	7	7	4	3	3
2	1	2	2	2	1	1	1	1	1	1	4	4	1	1	1	1	2	1	1	1	1	1	1	1	5	1	5	5	2	7	6	4	4	7	5	4	3	2	1	1	7	7	1	7	7	7	4	3	3
1	1	1	3	4	1	1	1	1	1	1	1	1	1	1	1	1	1	1	1	1	1	1	1	1	1	1	1	1	1	7	3	4	5	4	4	4	7	7	5	5	7	7	6	7	7	3	5	0	1
2	2	2	2	2	2	2	1	1	1	2	2	1	1	1	1	1	1	1	1	1	1	1	1	1	1	1	1	2	4	6	7	5	6	6	1	2	7	2	2	1	7	6	2	7	7	7	7	1	2
1	1	2	2	2	1	1	1	1	1	1	4	1	1	1	1	1	1	1	1	1	1	1	1	1	1	1	1	1	7	7	7	1	6	7	4	4	4	4	4	4	4	4	4	4	4	4	4	0	3
1	1	1	1	2	1	2	1	1	1	2	3	5	5	1	3	5	4	1	1	1	1	1	5	2	5	5	5	5	7	2	1	4	7	4	7	7	4	7	7	2	3	5	5	2	1	3	5	2	3
2	1	1	1	1	2	1	1	2	3	3	5	5	5	5	3	5	5	5	3	2	3	2	3	1	1	3	5	3	3	3	3	2	5	2	3	4	1	6	6	6	1	5	6	6	6	2	5	1	3
1	2	3	3	3	1	2	2	1	3	2	2	3	3	3	2	4	4	4	5	3	3	3	3	3	2	1	3	3	6	4	5	3	4	6	4	6	2	3	5	1	7	6	3	5	5	5	3	1	4
2	1	2	2	3	1	1	3	1	2	1	2	1	1	3	4	1	1	1	1	3	1	3	1	3	5	3	1	2	1	3	3	1	1	7	3	6	7	6	6	6	3	2	3	5	1	3	6	0	2
1	3	4	4	3	1	1	1	1	1	1	4	2	1	4	4	4	4	4	1	1	4	4	2	1	2	4	4	2	6	5	3	3	3	5	4	5	4	3	5	2	2	4	3	6	5	4	4	1	3
1	2	3	2	2	1	1	1	1	2	1	2	2	3	2	1	1	2	2	1	1	1	2	1	1	1	1	1	1	2	6	6	2	3	5	2	7	5	7	7	2	6	6	2	5	5	7	7	1	3
1	1	2	1	3	1	1	1	1	1	1	5	4	1	1	1	1	1	4	1	1	1	1	2	2	1	1	2	2	5	6	7	7	7	1	7	7	7	5	6	4	7	7	1	7	5	7	7	1	0
1	1	1	2	2	2	1	1	1	1	1	4	1	1	1	2	2	3	1	1	2	1	2	4	4	4	2	2	2	7	6	3	4	6	7	4	4	6	7	7	4	6	7	6	6	7	4	5	0	1
1	2	2	3	3	1	1	1	1	1	1	3	1	2	1	1	4	2	2	1	1	1	1	1	2	1	1	1	4	5	3	3	2	6	7	4	5	5	6	4	4	4	7	6	7	5	5	6	2	3
2	2	3	1	2	1	1	1	1	1	1	4	1	1	1	1	4	1	1	1	1	1	1	1	1	4	1	1	1	7	6	6	2	7	6	2	2	6	7	6	5	2	6	2	6	6	6	2	2	3
1	2	2	2	2	1	1	1	2	1	1	2	4	2	1	1	4	4	2	1	1	2	1	1	2	4	2	3	4	4	6	5	5	4	6	4	4	7	5	5	4	5	7	5	6	7	5	5	1	2
2	1	2	4	4	1	1	1	1	1	1	1	1	2	2	2	1	2	2	2	2	1	1	2	2	1	1	1	3	5	7	3	7	5	5	6	6	5	6	7	6	3	7	7	5	5	5	6	1	1
1	2	2	2	2	1	1	1	2	1	1	2	4	2	1	1	4	4	2	1	1	2	1	1	2	4	2	3	4	4	2	3	5	4	2	4	4	1	5	5	4	3	1	5	2	1	3	5	1	2
1	2	2	3	3	1	1	1	1	1	1	3	1	2	1	1	4	2	2	1	1	1	1	1	2	1	1	1	4	5	5	5	2	6	1	4	5	3	6	4	4	4	1	6	1	3	3	6	2	1
1	2	3	3	3	1	2	2	1	3	2	2	3	3	3	2	4	4	4	5	3	3	3	3	3	2	1	3	3	6	4	3	3	4	2	4	6	6	3	5	1	1	2	3	3	3	3	3	1	0
1	1	1	1	2	1	1	1	1	1	1	3	5	3	2	2	4	2	4	1	1	2	1	1	1	5	2	1	3	2	7	6	4	3	3	3	1	2	6	6	2	6	7	6	7	7	7	6	0	4
2	2	2	2	2	1	1	1	1	1	2	4	2	2	1	1	5	1	3	1	1	1	4	3	3	2	4	4	4	3	5	3	6	6	5	7	7	3	7	7	6	5	5	4	5	4	3	6	1	2
1	3	3	2	2	2	2	1	1	1	1	2	5	2	1	3	4	2	4	1	1	4	1	1	5	1	4	5	4	5	6	5	4	7	7	6	4	4	6	4	7	3	7	5	5	6	1	6	0	1
1	1	2	2	4	2	1	1	1	1	1	4	5	2	1	1	1	2	1	1	1	1	1	1	1	1	1	2	2	4	6	5	5	5	4	6	6	3	6	6	6	3	6	6	7	6	6	6	1	1
1	1	1	3	3	1	1	3	1	3	1	3	2	1	1	1	1	4	1	1	1	1	1	3	3	1	3	4	3	2	7	2	2	5	3	7	6	3	2	1	3	7	4	3	2	5	2	3	0	0
1	1	1	3	2	1	2	2	1	2	2	4	2	2	2	1	4	4	1	1	1	1	1	2	2	4	2	4	4	5	3	1	5	4	4	4	7	4	4	4	4	6	6	6	6	6	6	6	2	3
1	1	1	1	1	1	1	1	1	2	1	4	1	1	1	1	1	1	1	1	1	1	1	3	3	4	3	1	2	4	2	4	7	3	7	2	5	1	5	6	3	5	6	1	3	6	7	4	3	0
2	1	2	2	2	1	2	3	3	5	5	5	5	5	1	1	1	1	1	1	1	1	1	1	5	1	5	5	5	1	1	6	1	1	1	1	7	1	5	1	3	1	3	7	2	3	3	2	0	4
2	1	2	1	1	1	1	1	1	1	1	1	1	1	1	1	5	1	1	1	1	1	1	1	1	5	5	5	1	1	1	1	7	7	1	7	7	1	7	7	7	7	2	6	2	4	5	1	0	0
2	1	2	1	1	1	1	1	1	1	1	1	1	1	1	1	5	1	1	1	1	1	1	1	1	5	5	5	1	3	1	4	5	3	1	7	7	7	5	5	3	4	4	4	1	2	2	4	0	0
1	1	1	1	1	1	1	2	1	1	1	5	3	1	1	4	1	1	1	1	2	1	1	1	1	4	4	5	4	2	3	2	6	5	6	2	2	4	5	3	5	5	4	2	5	5	4	5	0	0
2	3	3	2	2	3	3	1	1	1	1	1	1	5	3	2	5	5	1	5	5	5	5	5	1	5	1	5	5	6	6	4	2	5	1	6	5	4	6	4	6	4	3	6	7	7	5	7	0	2
1	1	1	2	2	2	1	2	2	1	3	2	4	1	1	2	5	2	1	1	1	1	1	1	1	5	1	1	5	4	2	1	1	2	4	7	3	3	3	4	3	2	3	2	4	6	6	1	0	2
1	1	1	2	2	1	1	1	1	1	1	2	4	5	1	3	4	5	4	1	1	5	3	4	5	4	3	5	3	3	7	4	3	5	2	7	7	7	7	7	7	5	6	7	4	7	7	7	2	2
1	1	2	2	2	1	1	1	1	1	1	1	3	3	1	1	3	2	2	1	1	4	3	1	1	1	2	2	4	2	7	4	2	4	7	2	7	6	2	5	2	3	1	5	3	7	6	2	1	2
1	2	2	3	2	1	1	1	1	1	1	4	5	4	4	3	5	5	4	4	2	2	4	5	4	5	4	5	5	7	2	6	5	6	4	7	5	1	7	7	6	2	1	7	2	4	6	7	1	3
1	1	1	2	2	1	1	1	1	1	1	1	4	2	2	5	4	3	3	1	1	4	4	2	1	1	3	4	4	1	5	3	6	7	2	5	6	5	2	2	2	5	4	4	7	7	7	2	2	0
1	2	2	2	1	1	1	1	1	1	2	4	4	1	1	2	5	3	3	1	1	3	1	1	4	1	3	3	1	7	4	4	5	6	6	5	5	6	6	6	6	3	7	7	6	3	3	6	1	3
1	2	2	2	1	1	1	1	1	1	2	4	4	1	1	2	5	3	3	1	1	3	1	1	4	1	3	3	1	7	4	4	5	6	2	5	5	2	6	6	6	5	1	7	2	5	5	6	1	1
1	3	3	2	2	1	1	1	1	1	3	2	1	1	1	1	1	1	5	1	2	4	1	1	5	1	1	1	1	4	1	1	7	7	1	1	1	7	4	3	4	4	4	4	4	4	4	4	4	4
2	1	2	4	3	1	1	1	1	1	1	1	1	1	1	1	1	4	4	1	1	1	1	1	1	1	1	4	1	6	7	3	5	7	7	7	7	1	2	7	2	2	7	7	6	7	7	6	1	2
1	2	2	3	2	1	1	1	1	1	1	4	5	4	4	3	5	5	4	4	2	2	4	5	4	5	4	5	5	7	6	2	5	6	4	7	5	7	7	7	6	6	7	7	6	4	2	7	1	1
1	1	1	2	4	2	1	1	1	1	2	5	4	4	2	1	1	5	3	1	2	2	2	1	2	3	3	3	4	5	5	5	3	6	6	7	4	7	7	7	2	1	6	7	6	6	6	3	2	2
2	1	1	1	2	1	2	1	1	1	1	1	1	1	1	1	1	1	1	1	1	1	1	1	1	1	2	1	1	4	7	7	1	1	7	1	1	7	7	7	1	7	7	1	1	7	7	1	0	0
1	1	2	3	2	1	1	1	1	1	3	5	3	3	3	5	5	3	3	3	4	1	1	3	1	3	3	1	5	1	1	1	1	1	2	3	3	2	3	5	3	7	6	6	1	3	5	2	0	0
2	1	2	2	2	2	2	2	1	2	1	4	4	2	1	2	2	2	2	1	2	1	1	1	1	1	2	1	3	3	7	7	1	2	3	6	4	5	4	5	5	3	3	5	3	6	5	3	2	2
2	1	2	2	1	1	1	1	1	1	1	5	5	5	4	5	5	5	5	5	4	5	5	5	5	5	5	5	5	5	7	7	3	3	2	3	1	2	2	2	2	4	7	6	7	7	6	3	1	0
1	1	2	2	3	1	2	1	1	1	1	4	3	2	1	1	5	1	1	1	1	2	4	1	1	5	5	5	4	2	5	2	3	2	6	5	2	6	6	5	1	2	3	2	3	4	2	2	1	2
2	2	2	2	2	1	1	1	1	1	1	4	4	4	2	2	2	4	5	1	3	4	4	2	3	4	3	2	4	5	5	4	4	5	6	3	3	5	4	4	4	4	5	4	6	4	5	5	1	3
1	2	3	3	3	1	1	1	1	1	1	4	4	1	1	1	5	1	1	1	1	1	1	1	1	4	3	4	1	4	2	3	3	6	7	4	4	4	5	7	3	3	4	4	7	3	4	4	1	2
2	1	2	2	2	2	1	1	1	1	2	4	5	2	1	1	1	4	4	2	1	4	1	1	4	3	4	5	5	4	6	4	5	4	6	2	6	5	7	2	5	5	7	7	7	5	5	6	2	2
1	1	1	2	3	1	1	1	1	4	5	3	1	1	4	5	1	1	1	1	1	1	1	1	1	1	4	5	4	5	2	7	4	3	2	7	7	5	4	7	4	2	3	4	1	3	3	5	0	2
2	2	3	2	2	1	2	1	2	1	1	1	1	1	1	1	1	1	1	1	1	1	1	1	1	5	5	5	3	5	3	3	5	6	6	3	5	5	5	5	5	7	7	6	7	3	7	6	2	4
2	1	3	2	2	2	2	1	1	1	1	3	2	2	1	1	1	3	1	1	1	1	1	1	1	1	1	2	2	5	6	4	4	4	3	2	2	6	5	4	2	6	6	2	6	6	6	4	1	3
2	1	1	2	2	2	1	1	1	1	1	3	4	2	1	1	2	1	4	1	3	3	1	1	1	3	1	3	3	5	6	3	2	2	3	2	5	6	5	6	5	5	3	3	6	5	6	6	2	4
2	3	4	3	1	1	1	1	1	1	1	1	3	2	1	1	3	2	1	1	2	1	1	1	1	1	2	3	3	3	5	3	3	5	5	5	3	5	5	5	5	5	6	5	6	5	6	5	2	2
2	1	1	4	4	1	1	1	1	1	1	5	2	4	2	1	2	2	4	1	2	4	2	2	2	2	2	4	3	6	6	5	3	3	6	6	6	3	7	6	5	3	6	6	6	6	3	6	1	2
2	1	1	3	1	1	2	3	3	3	3	3	3	2	2	2	4	2	3	2	2	2	2	2	2	3	3	3	4	5	5	5	4	7	4	5	5	5	7	4	4	5	5	4	5	4	5	7	2	3
2	1	1	4	4	1	1	1	1	1	1	5	4	5	1	1	1	1	1	1	1	1	1	1	1	1	1	1	1	7	7	4	4	6	2	6	6	7	7	7	6	4	1	1	4	7	7	6	0	2
1	1	1	1	2	1	1	1	1	1	1	3	4	3	1	1	3	3	2	2	2	3	1	1	3	4	3	3	3	4	1	3	4	4	1	4	4	2	7	5	6	1	1	7	1	1	2	6	0	2
2	2	3	2	3	1	1	1	1	1	1	2	1	1	1	1	1	1	1	1	1	1	1	1	1	1	1	2	2	4	7	6	7	7	6	7	7	7	7	7	7	7	7	7	7	7	7	7	0	1
2	1	1	2	4	1	1	2	1	1	1	3	1	1	1	1	1	1	1	1	1	1	1	1	1	1	1	4	4	6	6	3	4	6	4	2	6	5	6	7	5	3	5	7	7	7	6	7	1	2
2	1	1	3	3	1	1	1	1	1	2	4	5	3	2	2	4	3	2	1	3	2	2	4	3	3	3	4	2	5	6	5	5	5	6	2	5	6	5	5	5	5	6	6	6	6	6	5	1	2
1	1	1	4	4	1	1	1	1	1	1	5	3	1	1	2	2	2	1	1	1	1	2	2	1	1	1	4	2	6	6	6	3	3	6	7	3	5	2	7	3	5	4	6	5	4	5	4	0	4
1	1	2	2	2	2	1	1	1	1	1	1	1	2	1	1	3	2	3	1	2	2	1	1	1	3	1	3	3	3	4	4	1	3	1	1	4	7	6	5	1	2	1	6	5	4	1	5	0	3
2	2	3	2	3	1	1	1	1	1	1	2	1	1	1	1	1	1	1	1	1	1	1	1	1	1	1	2	2	4	1	2	7	7	2	7	7	1	7	7	7	1	1	7	1	1	1	7	0	3
2	1	2	2	2	2	2	2	1	1	1	3	2	3	2	2	5	5	2	2	3	4	4	2	3	5	2	3	2	5	6	7	5	6	5	2	6	5	7	6	2	3	1	6	1	6	1	6	1	2
2	3	3	3	1	1	1	1	2	1	1	4	4	2	2	1	4	2	4	2	2	2	4	4	2	4	4	4	4	4	3	5	4	6	2	5	4	5	6	7	4	3	1	6	1	3	3	6	3	1
1	1	2	2	2	1	2	1	1	2	1	4	5	3	3	2	3	4	4	2	2	2	2	2	4	3	4	5	4	6	6	6	3	6	5	6	7	6	5	4	3	6	5	6	3	6	5	6	1	2
2	1	2	1	3	1	1	1	1	1	1	1	1	2	1	1	1	1	1	1	1	1	1	1	1	1	1	1	2	5	6	3	6	4	3	2	6	6	6	4	4	6	6	4	7	6	7	7	1	2
2	1	2	2	2	2	1	2	1	2	2	1	1	1	1	1	2	1	1	1	1	2	2	3	3	4	4	4	4	2	7	5	2	4	7	4	4	4	3	4	3	5	5	4	7	4	4	3	2	1
1	1	2	2	2	1	1	1	1	1	1	3	5	3	3	1	4	4	4	3	1	1	1	4	4	4	1	4	5	2	7	6	5	7	7	7	7	7	7	7	7	7	7	7	7	6	3	7	2	3
2	1	1	2	2	1	2	1	1	2	1	5	5	4	1	1	2	4	4	1	1	2	1	1	1	1	1	4	2	6	6	2	6	7	6	6	5	6	7	6	6	6	7	6	7	6	7	7	0	2
1	3	4	3	3	1	1	1	1	1	1	3	1	1	1	1	3	1	4	3	1	2	1	1	1	1	3	2	4	7	6	4	4	6	7	6	4	7	4	4	6	6	6	4	6	4	3	6	0	3
2	3	4	4	1	1	1	1	1	1	1	4	4	2	1	1	5	2	3	1	2	2	3	2	2	2	2	4	4	4	4	4	5	5	7	2	3	4	6	6	6	2	5	6	6	4	2	6	1	2
1	2	3	3	3	1	1	1	1	1	1	4	4	1	1	1	5	1	1	1	1	1	1	1	1	4	3	4	1	4	6	5	3	6	1	4	4	4	5	7	3	5	4	4	1	5	4	4	1	2
2	2	2	2	2	1	1	1	1	1	1	4	4	4	2	2	2	4	5	1	3	4	4	2	3	4	3	2	4	5	3	4	4	5	2	3	3	3	4	4	4	4	3	4	2	4	3	5	1	1
1	1	1	3	3	1	1	1	1	1	1	3	2	2	1	2	2	2	2	1	2	2	1	1	2	2	1	2	2	6	6	4	3	2	6	4	4	7	5	5	4	6	6	7	6	6	6	3	1	3
1	1	1	4	3	1	2	1	1	1	1	4	5	1	1	1	4	3	5	2	1	5	1	3	5	1	4	5	3	3	6	5	5	6	5	4	5	7	1	5	3	7	7	7	5	5	7	5	2	3
2	1	2	4	4	1	1	1	1	1	1	3	2	2	1	2	1	1	1	1	1	1	1	1	1	1	1	1	1	7	7	6	7	6	7	5	5	6	7	7	6	6	7	7	6	6	7	5	0	1
1	1	1	1	2	1	2	1	1	1	2	3	1	4	1	1	4	4	5	1	1	1	3	1	1	5	3	3	5	4	7	7	3	5	2	5	4	3	4	6	4	3	3	2	2	5	6	4	1	1
2	1	2	2	4	1	1	1	1	1	1	5	4	1	1	1	1	5	2	1	3	2	1	5	2	1	1	1	5	5	7	4	7	5	3	2	1	4	2	4	1	3	4	2	3	3	7	4	2	2
1	1	1	1	1	1	1	1	1	3	4	5	5	2	2	2	1	4	4	2	2	1	1	2	2	5	5	5	5	5	5	1	1	4	1	2	4	1	7	2	3	6	1	3	2	3	2	2	0	1
1	1	1	3	4	1	1	1	1	1	1	4	4	1	2	1	5	4	1	1	1	1	1	1	1	5	5	5	5	1	5	2	2	2	1	1	5	7	6	7	1	1	1	3	1	1	2	5	0	3
1	2	2	2	2	2	1	1	1	1	1	3	3	3	3	3	3	3	3	2	2	2	1	1	1	1	1	1	1	7	4	5	2	7	7	1	1	5	3	4	4	4	4	4	4	4	4	4	0	0
1	1	1	2	3	2	3	1	1	2	3	2	2	2	2	2	2	2	2	2	2	2	2	2	2	2	2	2	2	7	5	7	2	3	7	3	4	4	4	5	5	7	7	1	7	7	7	1	0	4
2	1	2	4	4	1	1	1	1	1	1	3	1	2	1	1	2	3	1	3	1	1	1	1	1	1	1	3	3	3	7	6	4	4	7	5	5	7	5	4	2	7	7	4	7	7	7	4	0	3
2	1	2	3	3	2	2	2	1	1	2	1	2	1	1	1	5	1	1	1	1	1	1	1	2	1	2	1	5	4	3	5	7	7	1	3	4	1	7	7	5	6	5	7	7	5	7	4	1	4
1	2	3	2	1	1	1	2	1	1	1	1	1	1	1	1	1	1	1	1	1	1	1	1	1	1	1	1	1	2	7	7	2	1	7	3	2	6	3	2	1	4	7	2	7	7	7	4	1	4
2	3	3	2	2	1	1	1	1	1	1	1	1	1	1	1	1	1	1	1	1	1	1	1	1	1	1	4	1	1	7	7	1	1	7	1	5	7	7	7	5	7	7	5	7	7	7	5	0	4
2	1	1	4	3	1	1	1	1	1	1	1	1	1	1	1	1	1	1	1	1	2	1	1	1	1	1	1	1	1	7	7	1	7	3	1	7	1	3	7	1	4	7	7	7	7	7	6	0	3
2	2	2	1	1	2	2	1	1	1	1	3	3	4	1	1	1	1	1	1	1	1	1	1	1	1	1	4	1	2	4	5	1	2	3	3	4	7	5	6	6	6	3	3	7	7	7	6	0	4
2	1	1	4	4	1	1	1	1	1	1	5	1	4	3	1	5	3	3	1	1	1	1	1	1	5	4	2	1	3	7	4	3	6	6	7	4	4	4	4	4	6	7	4	7	4	4	6	1	3
2	1	2	4	3	1	1	1	1	1	1	2	2	2	1	1	1	2	3	3	1	1	1	1	1	2	1	1	4	4	7	6	4	7	7	4	3	3	6	4	4	5	7	4	7	5	4	6	0	4
2	1	2	1	1	1	1	1	1	1	1	5	5	5	1	1	2	1	1	1	1	2	1	3	1	2	3	5	4	7	7	6	5	7	7	7	7	7	3	5	6	7	7	7	7	3	7	7	2	4
2	1	2	1	1	1	1	1	1	1	1	5	5	5	1	1	2	1	1	1	1	2	1	3	1	2	3	5	4	7	7	6	5	7	7	7	7	7	6	5	6	7	7	7	7	3	7	7	2	4
2	2	2	2	2	1	1	1	1	1	1	3	4	3	2	1	4	3	4	3	1	1	3	1	1	4	4	4	4	3	4	6	1	7	7	7	6	7	4	4	5	7	7	4	7	7	4	7	0	4
1	2	2	3	2	1	1	1	1	1	1	1	1	1	1	1	1	1	1	1	1	1	1	1	1	1	1	1	1	4	7	7	4	1	7	4	5	7	7	4	7	7	7	7	7	7	7	7	0	4
1	1	1	3	2	1	1	1	1	1	1	4	5	4	1	1	1	4	5	1	1	3	5	5	5	5	5	5	5	1	7	7	5	7	7	6	5	7	7	6	4	7	7	1	7	1	7	7	0	2
2	3	3	3	3	1	1	1	1	1	1	2	2	3	2	3	3	2	3	1	1	1	1	1	2	1	2	1	2	7	7	1	7	7	1	1	4	7	7	1	7	7	7	7	7	7	1	7	0	4
2	3	3	2	3	1	1	1	1	1	1	4	2	2	2	2	2	2	2	2	1	2	2	1	2	2	2	2	2	5	7	4	4	4	4	4	4	4	4	4	4		7	4	7	7	7	7	0	4
2	1	2	3	2	2	2	1	1	1	1	4	4	1	1	1	1	1	2	1	1	1	1	1	1	1	1	1	2	4	7	7	4	5	7	5	2	6	3	5	3	7	7	7	7	7	7	7	0	2
1	1	1	2	2	2	2	1	1	1	1	1	1	1	1	1	2	1	1	1	1	1	1	1	1	1	1	2	1	3	7	7	5	4	7	3	1	7	7	3	1	7	7	5	7	7	7	7	0	2
1	2	3	1	2	1	1	1	1	1	1	1	1	1	1	1	1	4	1	1	1	1	1	1	1	4	3	4	1	6	2	2	1	7	7	2	1	7	4	1	1	3	7	7	7	1	7	7	4	4
2	2	2	3	2	2	2	2	2	2	2	4	4	2	2	2	2	2	2	2	2	2	2	2	2	2	2	2	2	3	4	4	4	3	5	4	4	4	4	4	4	4	4	4	6	6	6	4	1	2
1	3	3	2	4	1	1	1	1	1	1	2	3	2	1	2	2	1	1	1	2	2	1	1	2	1	1	1	2	4	6	7	2	5	5	3	3	6	4	1	1	7	7	1	5	7	5	1	0	2
1	2	3	1	1	1	1	1	1	1	1	5	5	5	5	5	1	1	1	1	1	1	1	1	1	1	1	1	1	2	7	7	1	2	4	1	2	7	3	2	1	7	7	2	5	7	6	1	4	4
1	3	4	2	1	1	1	1	1	2	3	3	3	2	3	3	2	3	3	1	1	3	3	3	3	3	3	3	3	3	6	3	5	5	6	2	2	6	2	3	3	5	5	3	5	5	5	3	1	3
1	1	2	2	2	1	1	1	1	1	2	5	5	1	2	4	5	4	2	1	1	1	4	4	2	4	4	4	3	6	6	5	2	1	3	5	2	7	5	5	5	6	7	5	5	5	6	5	1	2
1	1	1	3	1	1	1	1	1	3	3	5	1	1	1	1	5	5	2	1	1	1	1	1	1	5	1	2	5	4	5	1	2	4	5	4	6	7	7	4	4	5	4	4	4	7	3	1	0	4
1	2	2	4	4	1	1	1	1	1	1	3	3	1	1	1	1	1	1	1	1	1	1	1	1	1	1	1	1	7	1	1	7	7	4	7	7	1	7	7	7	1	1	7	1	1	1	7	0	4
2	2	2	3	4	1	2	1	1	1	1	4	1	1	1	1	1	2	1	1	1	1	1	1	1	1	1	1	1	7	1	5	7	7	1	7	7	1	7	7	7	1	1	7	1	1	1	7	0	3
1	2	3	1	2	2	1	2	1	1	3	2	5	1	1	1	1	1	1	1	1	1	1	1	1	2	2	1	2	7	1	1	7	5	4	7	7	1	7	7	7	7	1	7	1	1	1	7	0	3
1	2	3	1	3	1	2	1	1	1	1	5	5	5	1	1	5	5	5	1	1	5	1	1	1	5	1	5	5	7	1	1	7	7	1	7	7	1	7	7	7	1	7	7	1	1	7	7	0	4
2	3	3	4	1	1	1	1	1	1	1	1	1	1	1	1	1	1	1	1	1	1	1	1	1	1	1	1	1	3	7	5	2	1	7	3	1	7	7	7	7	1	1	7	1	1	1	7	0	2
2	3	4	4	2	1	1	2	1	1	1	2	1	1	1	1	1	1	1	1	1	1	1	1	1	1	1	1	1	1	6	6	1	2	6	1	1	6	2	2	1	7	6	2	7	6	7	2	0	4
2	1	1	1	3	1	1	1	1	1	1	4	2	2	2	1	2	2	1	1	1	1	1	1	1	1	2	1	4	3	6	3	5	6	5	2	3	5	4	4	3	7	7	5	7	7	7	4	1	2
2	1	1	3	3	1	1	2	1	1	2	3	3	1	1	1	1	2	1	1	1	1	1	1	1	2	1	2	3	1	7	4	1	7	4	4	1	5	6	5	3	7	3	6	7	7	7	5	0	2
1	1	1	3	3	1	1	1	1	1	1	1	1	1	1	1	2	1	1	1	1	1	1	1	1	1	1	1	1	3	7	7	4	3	7	7	5	5	7	7	5	6	7	7	7	7	7	7	0	2
1	1	1	1	4	1	1	1	1	1	1	1	1	1	1	1	1	1	1	1	1	1	1	1	1	1	1	1	3	5	7	5	1	4	7	1	1	7	4	1	1	7	7	1	7	7	7	7	0	4
2	2	2	3	3	1	1	1	1	1	2	4	5	4	4	4	5	4	4	4	4	4	5	5	4	5	4	5	5	2	6	4	4	5	1	2	5	6	5	5	2	6	3	5	6	6	6	2	2	3
2	2	2	1	2	2	1	3	2	1	2	4	1	1	1	1	1	1	1	1	1	1	1	1	1	4	1	4	4	4	3	6	5	5	6	3	5	6	4	5	4	5	6	4	6	3	6	6	2	2
1	2	3	2	2	1	1	1	1	1	1	2	1	1	1	1	1	1	1	1	1	1	1	1	1	1	1	1	1	6	7	4	5	5	7	4	4	7	4	5	5	6	6	5	6	5	5	6	0	2
2	1	2	1	1	1	1	1	1	1	1	3	1	1	1	1	1	2	2	1	1	1	1	1	1	1	1	1	4	5	5	5	1	1	7	1	6	7	2	1	3	6	1	7	5	5	7	6	0	2
1	1	2	2	2	1	1	2	1	1	1	3	4	4	4	2	4	4	2	1	1	1	1	1	1	5	5	5	5	7	3	3	5	5	2	6	7	1	7	7	6	7	2	6	2	4	2	7	1	2
1	2	2	2	2	1	2	1	1	1	1	4	2	1	1	1	1	1	1	1	2	1	1	1	1	1	1	4	4	7	1	1	6	7	7	7	7	5	7	7	7	1	1	7	1	1	1	7	0	4
2	3	2	2	1	1	1	1	1	1	1	1	4	1	1	1	1	1	1	1	1	1	1	1	1	1	1	1	1	6	2	2	1	1	7	1	4	7	6	6	6	7	7	1	7	7	7	1	0	2
1	1	1	2	4	1	1	1	1	1	1	2	1	1	1	1	1	1	1	1	1	1	1	3	1	1	1	2	3	7	7	3	6	7	6	5	6	5	6	6	4	5	7	4	7	7	5	4	0	1
1	1	1	2	1	1	2	1	1	1	3	1	5	4	1	1	1	1	1	1	1	1	1	1	1	1	1	1	1	7	7	5	5	4	7	4	1	4	5	2	5	6	7	4	7	7	7	4	0	1
1	2	2	1	3	1	1	2	2	2	2	4	4	3	2	2	2	4	2	2	2	2	2	2	2	5	4	5	5	7	6	6	5	7	7	6	6	7	6	6	5	7	7	7	7	7	7	6	0	2
1	2	2	3	3	1	1	1	1	1	1	4	3	1	1	1	4	1	1	1	1	1	1	1	1	1	1	1	1	6	6	2	5	5	5	4	5	3	7	7	7	5	7	7	7	6	7	7	0	1
1	1	1	3	3	1	1	1	1	1	1	4	4	5	2	1	4	5	4	1	1	3	2	2	3	4	4	4	4	4	6	7	4	4	7	4	4	7	4	4	3	7	7	6	7	7	7	7	1	2
2	1	2	2	1	1	1	1	1	1	1	3	4	2	1	1	3	3	5	4	1	3	1	4	3	5	2	5	2	6	7	7	3	4	5	3	2	7	3	3	3	6	3	6	6	7	7	7	3	2
2	2	2	3	3	1	1	1	1	1	1	4	1	1	2	2	1	1	1	1	1	1	1	1	1	1	1	2	4	3	2	4	5	7	1	7	7	4	7	7	7	4	1	7	1	1	1	7	0	3
2	1	1	2	2	1	1	1	1	1	3	2	3	1	1	2	1	1	2	1	1	1	1	1	2	1	1	1	1	6	2	5	5	7	1	6	6	1	7	7	7	4	1	7	1	1	5	7	0	2
1	2	3	4	2	1	1	2	2	1	1	4	3	2	2	1	1	1	1	1	1	1	1	1	1	1	1	1	2	7	7	7	6	6	7	5	6	2	6	6	6	7	7	6	7	7	2	7	0	1
1	2	3	2	2	1	1	1	1	1	1	3	1	1	1	1	1	1	2	1	2	1	1	1	1	1	1	1	1	4	1	1	4	7	1	7	7	1	4	7	1	1	1	4	1	1	1	7	0	3
1	2	2	2	3	1	1	1	1	1	1	3	5	1	1	1	1	1	1	1	1	1	1	1	1	1	1	1	1	7	7	4	2	2	7	7	7	1	7	7	7	7	7	7	7	6	7	4	0	0
1	2	5	3	1	2	2	1	1	5	5	5	5	5	5	5	5	5	5	5	5	5	5	5	5	5	5	5	5	7	1	4	7	7	1	7	7	7	7	7	7	7	7	7	7	3	7	5	1	2
1	2	3	1	1	2	2	1	1	1	1	1	1	1	1	1	1	1	1	1	1	1	1	1	1	1	1	1	1	7	7	6	7	7	7	1	7	7	7	7	7	1	7	7	7	7	7	7	0	0
1	2	2	4	3	1	1	1	1	1	1	1	1	1	1	1	1	1	1	1	1	1	1	1	1	1	1	1	1	7	7	7	1	7	7	7	7	7	7	7	7	7	6	7	7	7	7	7	0	0
1	2	2	4	4	1	1	1	1	1	1	1	1	1	1	1	1	1	5	1	1	1	1	1	1	1	1	1	1	7	7	6	7	1	7	7	7	7	7	6	6	7	7	7	7	7	7	7	0	0
1	2	3	2	2	1	1	5	5	5	5	5	5	5	3	3	5	5	4	5	4	5	1	1	4	4	3	5	5	7	7	6	7	7	7	7	7	2	7	7	7	1	7	7	7	7	7	7	0	4
1	3	3	4	4	1	1	1	1	1	1	1	1	1	1	1	1	1	1	1	1	1	1	1	1	1	1	1	1	7	7	7	7	7	1	7	4	7	7	7	7	7	7	7	7	7	7	7	0	0
1	2	3	1	1	1	1	1	1	1	1	5	5	2	2	4	1	1	1	1	1	1	1	1	4	1	1	4	4	7	1	1	7	1	1	7	7	7	7	7	1	1	7	1	1	1	7	1	0	4
2	2	3	2	2	1	2	1	1	1	1	4	1	1	1	1	2	1	1	1	1	1	2	1	1	1	1	1	2	7	6	1	5	5	1	6	5	5	6	7	7	6	1	6	1	1	6	6	0	2
1	2	2	2	2	1	1	1	1	5	1	3	2	1	3	2	1	1	1	1	1	1	5	4	3	5	1	3	4	7	1	1	4	2	1	7	7	1	4	5	4	3	4	7	7	1	1	3	0	3
1	1	2	4	4	1	1	1	1	3	2	3	2	1	1	1	1	1	1	1	1	1	1	1	1	1	1	1	1	1	7	7	2	2	7	5	5	7	6	6	6	7	7	5	6	7	7	5	0	3
1	1	2	4	4	1	1	1	1	1	1	4	4	3	2	2	2	4	2	2	2	2	1	2	2	2	2	2	2	1	7	6	2	2	7	5	5	7	5	5	5	6	6	5	6	7	7	5	0	4
2	1	2	2	2	2	1	1	1	1	1	1	5	2	1	2	2	3	4	3	1	1	2	2	1	1	1	2	1	2	7	7	2	6	5	3	3	5	4	3	3	6	7	1	5	6	7	2	0	4
1	3	4	2	2	1	1	1	1	1	1	2	4	1	1	1	4	1	1	1	1	1	1	1	1	1	1	2	1	7	1	2	5	7	1	7	7	1	5	7	3	2	1	7	1	1	1	6	0	4
1	2	3	3	3	1	1	1	1	1	1	5	4	1	1	1	1	4	1	1	1	5	1	1	2	1	2	2	4	7	1	1	7	7	1	7	7	1	7	7	6	1	1	7	1	1	7	7	0	3
1	2	2	2	1	1	1	1	1	1	1	3	4	3	4	1	3	4	2	1	4	1	4	4	5	5	4	5	5	2	1	1	6	6	1	6	7	1	7	7	6	1	6	7	1	1	7	7	0	0
1	2	2	3	3	2	2	1	1	1	1	1	1	1	1	2	1	1	1	1	1	1	1	1	1	1	1	1	1	6	2	5	5	4	7	7	3	3	6	6	4	2	2	5	2	3	2	4	0	2
2	3	3	1	2	1	1	1	1	1	1	3	2	2	1	1	4	2	1	1	1	1	1	2	2	2	2	3	3	4	4	4	4	4	4	4	4	5	3	3	3	5	5	3	4	5	4	4	1	2
1	1	1	2	1	1	1	1	1	1	3	3	5	4	1	1	4	1	3	1	1	1	1	2	4	3	1	3	4	6	1	1	5	7	1	6	4	1	4	4	4	2	1	7	2	1	1	7	0	3
1	1	2	3	1	1	2	1	1	1	2	4	4	4	3	4	3	3	5	4	3	3	3	3	3	3	2	3	3	6	7	6	3	2	5	2	5	7	2	4	5	6	6	6	7	7	7	5	1	2
1	3	3	4	2	1	1	1	1	1	2	4	4	1	1	1	1	4	2	2	1	2	1	1	1	1	2	5	5	7	6	2	5	5	7	7	7	4	7	7	6	6	7	7	6	3	1	7	1	1
1	1	2	1	1	1	1	1	1	1	1	4	4	1	1	4	3	4	5	1	1	5	1	3	4	1	5	5	5	7	7	7	1	5	1	3	4	4	4	4	5	5	5	5	4	5	6	5	0	2
2	2	2	2	2	1	1	2	1	2	1	4	5	4	2	2	4	4	4	2	2	4	2	2	4	4	4	4	4	5	4	4	5	5	4	4	4	4	4	5	4	5	4	5	4	4	3	5	2	2
2	2	2	3	1	1	2	1	1	1	1	4	3	2	2	2	1	1	4	1	1	5	1	1	3	1	1	1	1	1	1	4	5	7	1	7	6	4	6	7	7	1	1	7	1	1	5	6	0	3
1	2	2	1	1	2	2	1	2	1	2	1	1	1	1	1	5	1	1	1	1	1	1	1	1	5	1	5	5	2	7	4	4	4	4	4	4	4	4	4	4	4	4	4	4	4	4	4	1	3
1	1	1	1	1	2	1	1	1	1	1	1	1	1	1	1	2	1	1	1	1	1	1	1	1	1	1	1	2	5	5	1	1	4	1	2	4	1	7	2	3	6	1	3	2	3	2	2	0	2
1	2	3	2	3	1	2	1	1	1	1	2	5	5	3	3	5	3	5	5	3	5	3	3	5	3	5	5	5	6	4	4	7	7	1	7	7	4	7	7	7	4	1	7	1	4	1	7	0	1
2	2	3	3	3	1	1	1	1	1	1	4	1	1	1	1	1	1	1	1	1	1	1	1	4	1	1	1	1	6	2	2	4	5	2	6	6	2	7	5	5	1	1	6	1	1	5	7	3	3
2	2	2	2	2	1	1	1	1	1	1	4	5	5	3	1	5	5	5	2	2	2	1	4	4	5	3	5	5	6	4	6	5	7	1	6	6	1	7	7	6	2	1	7	1	1	3	7	0	2
1	2	3	2	3	1	1	1	1	1	1	2	3	2	2	1	1	1	1	1	1	1	1	2	1	1	1	1	3	7	1	2	6	6	1	6	6	3	6	6	6	6	3	7	2	2	2	7	0	2
2	2	2	1	1	1	1	1	1	1	1	1	1	1	1	1	1	1	1	1	1	1	1	1	1	1	1	1	1	4	1	1	6	6	1	2	4	1	4	5	5	3	4	4	1	1	1	6	0	4
2	3	4	2	1	1	2	1	1	2	2	2	3	2	1	1	2	4	2	1	1	2	1	1	1	4	1	4	4	5	1	3	3	7	1	7	7	1	7	7	7	1	1	7	1	1	1	7	1	1
1	1	1	1	1	1	2	1	2	1	1	1	4	1	1	1	4	4	4	2	1	4	3	2	5	1	1	1	1	5	1	1	4	1	1	1	6	6	4	1	4	1	1	7	1	1	1	7	1	0
1	2	3	2	2	1	1	1	1	1	1	3	3	1	1	3	1	3	3	1	1	2	1	1	1	1	1	1	3	2	5	7	1	2	6	7	7	7	3	3	3	7	7	3	7	7	7	3	0	2
2	1	1	4	3	1	1	1	1	1	1	1	1	1	1	1	1	1	1	1	1	1	1	1	1	1	1	1	1	2	7	7	7	7	2	1	1	7	4	4	4	7	7	7	7	7	7	4	0	2
1	1	2	2	1	1	1	1	1	1	1	4	5	2	1	1	4	1	5	1	2	1	1	1	1	1	5	5	5	5	7	6	7	2	7	4	7	7	7	7	7	6	7	7	7	7	7	6	0	2
2	1	2	2	2	1	1	1	1	1	1	5	5	4	2	1	2	4	4	2	1	4	1	1	4	3	4	4	4	6	6	3	7	6	7	7	6	7	7	5	5	7	7	7	7	3	7	6	1	2
1	2	2	2	2	2	1	1	1	2	1	2	1	1	1	1	1	1	1	1	1	1	1	1	1	1	1	1	1	7	6	3	6	7	7	7	7	6	7	7	7	7	7	7	7	7	7	7	0	3
2	1	1	2	2	1	2	1	1	2	2	1	1	1	1	1	1	1	1	1	1	1	1	1	1	1	1	1	1	3	7	7	1	4	7	7	5	7	7	7	7	7	7	7	7	7	7	7	0	2
2	3	4	2	2	1	1	1	1	1	1	3	4	2	2	1	4	1	1	1	1	1	2	3	1	1	1	1	1	5	7	4	6	7	7	7	4	7	7	7	6	7	7	7	7	7	4	7	0	1
2	3	3	2	3	1	1	2	1	2	1	4	4	4	1	1	4	4	1	1	1	1	1	1	1	1	2	4	3	5	7	3	5	5	6	5	5	5	5	5	5	5	3	5	5	6	6	5	1	3
2	1	1	2	2	1	2	1	1	1	1	3	1	1	1	2	4	2	1	1	3	1	1	1	1	1	1	1	1	5	7	6	2	5	6	2	5	6	5	5	2	6	5	2	5	5	6	5	2	3
1	1	1	2	1	2	2	1	1	5	1	4	4	3	2	1	4	4	2	2	3	1	1	1	2	4	4	2	1	4	7	4	4	5	3	5	5	3	5	5	5	3	3	5	3	3	3	5	0	2
1	1	2	2	1	1	1	1	1	1	1	1	2	2	2	2	1	1	1	2	2	2	1	1	2	1	1	1	1	4	1	3	5	4	2	4	3	1	2	3	5	4	4	4	3	3	2	5	1	2
2	2	2	3	3	1	1	1	1	1	1	2	4	2	1	1	4	1	3	1	1	1	1	1	1	2	3	4	3	4	7	7	4	7	7	2	5	7	6	6	6	7	7	5	7	7	4	4	0	2
1	1	2	2	2	1	1	1	1	1	1	4	1	2	1	1	1	1	1	1	1	1	1	1	1	1	4	1	1	3	7	6	6	6	6	6	7	7	7	7	7	7	7	7	7	7	7	7	0	3
2	2	2	1	1	1	1	1	1	1	1	3	3	3	3	3	3	3	3	3	3	3	3	3	3	3	3	3	3	7	7	7	4	5	1	7	1	7	7	5	1	7	3	7	7	7	7	7	0	2
1	1	2	4	4	1	1	1	1	1	1	2	2	2	4	2	2	2	2	2	2	2	4	2	2	2	2	2	2	5	6	5	2	6	3	5	5	3	6	5	5	6	7	6	6	6	6	5	1	2
2	2	1	3	3	1	1	1	1	1	1	3	2	1	1	1	2	2	1	1	1	1	1	1	1	2	2	1	4	4	6	2	5	5	7	6	5	4	5	6	5	7	7	5	6	6	2	6	0	2
1	1	2	2	2	2	2	2	1	2	2	1	4	4	4	1	4	2	3	3	1	1	4	4	4	1	4	2	4	2	4	6	1	2	2	3	4	7	4	4	2	5	3	3	5	3	5	4	1	3
2	1	1	4	4	1	1	1	1	1	1	5	4	4	1	1	2	4	4	1	1	2	1	2	4	1	5	4	5	4	6	6	5	4	4	7	4	3	7	7	5	4	6	4	5	7	3	5	0	2
1	2	3	1	2	1	2	2	3	1	1	3	3	3	3	3	3	5	2	3	5	5	1	1	1	5	3	3	4	7	1	1	7	7	1	7	1	2	2	4	4	5	4	4	4	5	3	2	2	2
1	2	3	4	3	1	1	4	2	1	1	1	1	1	1	1	1	1	1	1	1	3	2	5	2	5	5	1	4	4	2	5	4	1	6	1	3	6	7	2	5	2	7	4	4	5	6	4	3	3
1	1	1	2	3	3	2	2	4	4	4	4	4	4	3	4	3	3	3	2	2	2	2	2	2	2	4	4	4	6	4	4	5	5	3	5	5	3	5	5	5	3	3	5	4	3	3	5	2	2
2	2	2	2	2	2	2	1	1	1	1	1	2	1	1	1	4	1	2	1	1	1	1	1	1	3	1	1	5	2	5	4	3	6	3	4	1	4	6	4	4	3	7	7	4	3	3	6	1	3
1	2	2	3	3	1	2	1	2	1	2	2	1	1	1	1	1	1	1	1	1	3	4	2	5	1	5	5	5	5	4	2	1	1	2	1	3	4	2	6	1	3	2	6	2	3	6	2	1	2
2	2	2	2	2	1	1	1	1	1	1	2	2	3	4	2	4	4	2	2	2	2	2	2	2	2	2	2	2	4	2	4	5	5	2	4	4	4	5	5	4	3	3	4	2	2	2	6	1	3
2	2	2	1	1	1	1	1	1	1	2	2	5	1	1	1	5	5	5	1	1	4	1	1	1	4	1	4	5	7	2	1	7	6	7	7	7	1	7	7	7	1	7	1	1	3	4	6	0	1
1	1	2	3	3	1	2	1	1	1	1	3	3	4	1	4	1	1	1	1	3	1	1	1	1	1	1	1	1	4	7	7	4	4	5	3	3	7	4	4	4	6	7	7	7	7	7	1	0	2
1	2	2	3	2	1	1	1	1	1	1	1	1	1	1	1	1	3	2	1	1	1	1	1	1	1	3	5	2	5	4	2	5	4	7	7	7	7	7	7	7	1	7	7	7	7	7	7	0	4
1	3	3	4	4	1	1	1	1	1	1	1	1	1	1	1	1	1	1	1	1	1	1	1	1	1	1	1	1	1	7	5	7	7	7	5	7	5	7	7	7	5	7	7	7	7	1	7	0	0
1	1	1	4	4	1	1	1	1	1	2	1	1	3	1	2	1	2	1	1	2	1	1	1	1	1	4	3	4	3	7	5	2	6	7	5	6	7	3	4	2	7	7	7	7	7	7	7	1	2
2	2	2	4	2	1	2	1	1	1	1	1	2	2	1	1	1	1	1	1	1	1	1	1	1	1	1	1	1	7	6	3	5	6	5	6	5	6	5	6	6	6	7	7	7	5	7	7	0	2
2	1	2	2	1	1	1	4	4	4	4	5	5	5	1	1	5	5	5	1	1	5	1	1	1	1	5	5	5	7	1	3	7	7	7	7	4	7	7	7	7	7	7	7	7	4	1	7	2	2
2	2	2	3	4	1	1	1	1	1	1	2	1	1	1	1	2	1	1	1	1	1	1	1	1	1	1	1	2	5	7	1	7	7	3	4	4	4	4	4	4	5	5	3	7	5	4	7	0	1
1	3	3	2	1	2	2	1	1	1	1	4	5	4	3	2	4	2	2	2	3	2	3	3	2	4	3	4	4	4	7	3	1	3	6	2	1	5	2	2	1	6	5	3	6	6	5	1	0	0
2	3	3	3	3	1	1	1	1	1	1	2	2	1	1	1	2	1	1	1	1	1	1	1	1	1	1	1	2	4	6	5	3	5	6	4	5	3	6	4	3	6	6	5	6	7	6	5	0	2
1	3	4	4	4	1	1	3	2	1	2	2	4	5	2	3	5	4	5	3	4	5	3	1	5	3	3	3	3	3	7	4	4	2	6	2	7	7	3	4	4	4	7	7	6	5	5	6	0	0
2	1	2	4	4	1	1	1	1	1	1	4	4	2	2	2	2	3	1	1	2	1	1	1	2	3	4	4	3	5	5	5	5	6	6	2	5	3	6	5	2	6	3	5	6	6	6	6	1	2
1	2	3	1	3	1	1	1	1	1	1	3	3	2	3	3	3	3	3	3	3	3	3	3	3	3	3	3	2	7	6	6	4	4	6	4	3	5	4	4	4	5	4	4	4	5	5	4	0	2
1	2	3	1	3	1	1	1	1	1	1	3	3	2	3	3	3	3	3	3	3	3	3	3	3	3	3	3	2	7	2	2	4	4	2	4	3	3	4	4	4	3	4	4	4	3	3	4	0	2
2	2	2	2	2	1	2	1	3	3	3	2	1	1	1	1	4	1	1	1	1	1	1	4	1	1	1	1	4	2	5	6	6	5	2	1	2	2	2	5	2	4	6	2	2	4	6	6	2	2
1	2	2	3	2	1	1	1	1	1	1	1	1	1	1	1	1	3	2	1	1	1	1	1	1	1	3	5	2	5	4	6	5	4	1	7	7	1	7	7	7	7	1	7	1	1	1	7	0	0
2	3	4	2	2	2	2	2	2	5	2	5	5	5	3	4	5	5	5	5	5	5	5	4	4	5	3	3	4	7	1	1	7	7	1	2	7	3	7	7	7	5	2	7	1	1	1	7	1	2
2	2	2	3	4	1	1	1	1	1	1	2	1	1	1	1	2	1	1	1	1	1	1	1	1	1	1	1	2	5	1	7	7	7	5	4	4	4	4	4	4	3	3	3	1	3	4	7	0	3
2	2	2	1	1	1	1	1	1	1	2	2	5	1	1	1	5	5	5	1	1	4	1	1	1	4	1	4	5	7	6	7	7	6	1	7	7	7	7	7	7	7	1	1	7	5	4	6	0	3
2	1	1	2	1	1	1	1	1	1	1	4	5	4	4	2	5	2	1	1	1	1	2	1	1	4	1	1	1	4	7	2	6	6	2	6	6	2	3	7	7	5	7	7	7	5	7	7	0	1
2	2	3	2	2	1	1	1	1	1	1	1	1	1	1	1	4	1	1	1	1	1	1	1	1	1	4	4	4	5	7	2	4	7	3	2	1	2	7	6	7	2	3	6	7	3	3	7	1	1
1	2	2	3	3	1	2	1	2	1	2	2	1	1	1	1	1	1	1	1	1	3	4	2	5	1	5	6	5	5	4	6	1	1	6	1	3	4	2	6	1	5	6	6	6	5	2	2	1	2
2	2	2	2	2	1	1	1	1	1	1	2	2	3	4	2	4	4	2	2	2	2	2	2	2	2	2	2	2	4	6	4	5	5	6	4	4	4	5	5	4	5	5	4	6	6	6	6	1	1
1	3	4	3	2	1	1	1	1	1	1	2	2	2	1	1	1	2	1	1	1	1	1	1	1	1	1	3	4	4	7	4	5	6	6	6	3	4	6	6	6	6	7	6	6	7	7	6	0	1
1	1	2	2	2	2	1	1	1	1	1	3	2	1	1	1	2	1	1	1	3	1	1	1	1	1	2	2	1	7	7	4	3	7	7	7	3	7	7	6	4	1	4	5	6	7	3	7	1	1
2	1	1	3	3	1	1	1	1	1	1	3	4	2	1	2	5	3	2	1	3	1	5	5	3	2	5	5	5	2	2	3	4	7	5	6	7	2	6	7	5	4	1	5	5	4	4	6	1	2
1	2	3	4	3	1	1	4	2	1	1	1	1	1	1	1	1	1	1	1	1	3	2	5	2	5	5	1	4	4	6	3	4	1	2	1	3	2	7	2	5	6	1	4	4	3	2	4	3	1
2	2	2	2	2	2	2	1	1	1	1	1	2	1	1	1	4	1	2	1	1	1	1	1	1	3	1	1	5	2	3	4	3	6	5	4	1	4	6	4	4	5	1	7	4	5	5	6	1	1
2	2	1	3	3	1	1	1	1	1	1	3	2	1	1	1	2	2	1	1	1	1	1	1	1	2	2	1	4	4	2	6	5	5	1	6	5	4	5	6	5	1	1	5	2	2	6	6	0	2
2	2	2	3	3	1	1	1	1	1	1	2	4	2	1	1	4	1	3	1	1	1	1	1	1	2	3	4	3	4	1	1	4	7	1	2	5	1	6	6	6	1	1	5	1	1	4	4	0	2
2	2	2	1	1	1	1	1	1	1	1	3	3	3	3	3	3	3	3	3	3	3	3	3	3	3	3	3	3	7	1	1	4	5	7	7	1	1	7	5	1	1	5	7	1	1	1	7	0	2
1	3	4	2	1	1	1	1	1	1	1	5	5	1	1	1	5	3	1	2	4	1	2	4	4	2	1	3	4	4	1	4	4	4	1	4	4	4	1	4	4	4	4	4	3	1	1	7	0	0
2	1	1	4	4	1	2	1	1	1	1	4	4	1	1	1	1	1	1	1	1	1	1	3	1	1	1	4	4	5	1	1	5	7	1	4	7	1	7	5	6	1	1	7	1	1	1	7	0	2
1	2	2	2	2	2	1	1	1	2	1	2	1	1	1	1	1	1	1	1	1	1	1	1	1	1	1	1	1	7	2	5	6	7	1	7	7	2	7	7	7	1	1	7	1	1	1	7	0	1
2	2	2	1	1	1	1	1	1	1	1	1	1	1	1	1	1	1	1	1	1	1	1	1	1	1	1	1	1	4	7	7	6	6	7	2	4	7	4	5	5	5	4	4	7	7	7	6	0	0
1	2	3	2	3	1	1	1	1	1	1	2	3	2	2	1	1	1	1	1	1	1	1	2	1	1	1	1	3	7	7	6	6	6	7	6	6	5	6	6	6	2	5	7	6	6	6	7	0	2
2	1	2	3	3	2	2	2	1	3	1	2	5	1	2	1	2	2	1	1	1	1	3	1	1	2	3	6	5	2	7	5	6	6	3	5	3	3	2	6	3	5	1	6	7	7	7	5	0	2
1	2	3	2	3	1	2	1	1	1	1	2	5	5	3	3	5	3	5	5	3	5	3	3	5	3	5	5	5	6	4	4	7	7	7	7	7	4	7	7	7	4	7	7	7	4	7	7	0	3
2	2	3	3	3	1	1	1	1	1	1	4	1	1	1	1	1	1	1	1	1	1	1	1	4	1	1	1	1	6	6	6	4	5	6	6	6	6	7	5	5	7	7	6	7	7	3	7	3	1
2	2	2	2	2	1	1	1	1	1	1	4	5	5	3	1	5	5	5	2	2	2	1	4	4	5	3	5	5	6	4	2	5	7	7	6	6	7	7	7	6	6	7	7	7	7	5	7	0	2
2	1	2	3	2	1	1	1	1	1	1	1	1	1	1	1	1	1	1	1	1	1	1	1	1	1	1	1	1	4	6	5	4	3	7	3	3	7	7	7	6	5	6	6	7	6	4	7	0	2
2	1	2	2	2	2	1	1	1	1	1	2	4	2	2	1	1	2	2	1	1	2	1	1	1	1	3	4	4	5	7	3	5	2	6	5	5	7	2	5	2	6	6	5	6	6	6	5	1	2
2	1	2	3	4	1	1	1	1	1	1	2	1	1	1	1	1	1	1	1	1	1	1	1	1	1	1	1	1	5	7	2	5	5	6	6	5	3	5	6	5	6	6	4	6	5	6	5	0	3
1	1	4	2	2	2	1	2	1	1	1	4	2	3	2	2	2	2	4	3	2	2	2	1	3	2	2	2	2	5	7	7	6	6	7	6	6	7	6	6	6	5	7	6	6	7	2	6	1	1
2	1	2	3	2	2	2	3	3	3	1	5	2	1	1	1	1	2	4	1	1	1	1	1	1	1	1	2	2	5	6	5	6	5	7	3	5	2	4	5	5	5	6	7	6	6	6	6	1	2
1	1	2	2	1	1	2	1	1	1	1	4	5	4	2	1	3	2	5	2	3	2	3	2	3	5	2	4	2	6	6	4	5	6	7	4	5	2	6	6	3	6	6	2	6	5	3	6	1	2
1	1	2	2	2	1	1	1	1	1	1	5	4	2	2	1	4	5	2	1	1	1	1	1	1	1	1	3	4	3	7	3	4	1	7	7	7	7	4	1	5	7	3	7	6	7	7	7	0	0
1	1	1	3	2	1	2	1	1	1	1	3	3	1	1	2	1	3	4	2	5	3	1	1	4	1	4	5	4	2	7	5	3	2	5	5	4	6	3	3	2	1	5	4	5	7	4	2	1	2
1	2	2	1	1	2	2	1	2	1	2	1	1	1	1	1	5	1	1	1	1	1	1	1	1	5	1	5	5	2	1	4	4	4	4	4	4	4	4	4	4	4	4	4	4	4	4	4	1	1
2	1	2	2	2	1	2	1	1	1	1	1	3	1	1	1	1	1	3	1	2	2	1	1	1	1	3	1	1	7	3	5	6	6	2	5	5	2	3	6	5	3	3	7	2	5	3	5	1	3
2	3	3	2	2	2	1	1	1	1	1	3	1	1	1	1	4	1	1	1	1	1	1	1	1	1	1	4	4	1	7	7	2	1	7	4	4	7	4	4	4	7	7	4	7	7	7	4	0	2
1	1	2	2	4	2	2	1	1	1	1	1	3	1	1	1	2	1	1	1	1	1	1	1	1	2	2	4	3	6	7	7	5	6	3	7	7	2	7	7	6	5	5	6	7	7	5	5	0	2
1	3	3	4	2	1	2	1	1	1	1	4	4	4	2	2	2	3	4	1	1	2	2	1	4	2	2	2	2	5	7	7	6	5	7	5	5	3	5	5	5	7	7	4	7	7	7	5	0	2
2	1	2	2	4	2	1	1	1	1	1	2	4	1	1	1	1	2	1	1	1	1	1	1	1	1	1	3	4	6	6	6	6	6	7	7	6	7	6	6	5	6	7	7	7	7	7	6	0	1
2	2	2	3	1	1	2	1	1	1	1	4	3	2	2	2	1	1	4	1	1	5	1	1	3	1	1	1	1	1	7	4	5	7	7	7	6	4	6	7	7	7	7	7	7	7	3	6	0	1
1	3	5	2	3	1	1	1	1	1	1	4	3	2	1	1	1	2	1	1	1	1	1	1	1	1	3	3	3	6	7	3	5	7	7	4	4	5	5	6	5	5	7	5	7	7	6	7	0	2
1	1	2	1	1	1	1	1	1	1	1	5	2	2	1	1	1	1	1	1	1	1	1	1	1	1	1	1	1	2	7	7	5	4	7	4	4	7	5	1	1	7	2	1	7	7	4	7	0	2
2	1	2	2	2	2	2	1	1	1	1	4	4	2	3	2	2	3	4	2	2	2	2	2	2	2	4	3	4	6	6	6	3	6	5	6	7	6	4	4	2	6	6	4	6	5	6	5	0	2
2	3	3	2	2	2	2	1	1	1	1	2	2	2	1	2	2	1	2	2	2	1	1	1	1	1	1	2	2	5	6	4	3	4	7	5	1	6	6	6	6	6	6	6	6	5	5	6	0	4
2	1	2	2	2	2	2	1	1	1	1	3	3	2	1	2	2	3	5	2	1	5	2	2	4	3	2	3	4	3	6	7	5	5	6	2	5	7	5	4	4	6	5	5	5	6	7	6	1	1
2	2	2	2	2	1	1	2	1	2	1	4	5	4	2	2	4	4	4	2	2	4	2	2	4	4	4	4	4	5	4	4	5	5	4	4	4	4	4	5	4	3	4	5	4	4	5	5	2	2
2	1	2	2	1	1	1	1	1	1	1	4	5	3	1	1	1	1	1	1	2	1	1	1	4	3	1	4	5	6	2	3	7	7	1	6	7	3	7	7	7	2	1	6	1	1	1	7	0	3
1	2	2	3	3	2	2	1	1	1	1	1	1	1	1	2	1	1	1	1	1	1	1	1	1	1	1	1	1	6	6	3	5	4	1	7	3	5	6	6	4	6	6	5	2	5	6	4	0	2
1	1	4	3	1	1	2	1	1	1	1	1	1	1	1	1	1	1	1	1	1	1	1	1	1	1	1	1	1	7	7	7	7	7	7	7	7	7	7	7	7	7	7	7	7	7	7	1	0	1
1	1	1	1	2	1	1	1	1	1	1	2	2	1	1	1	2	1	2	1	1	2	3	2	2	1	1	2	4	4	7	7	3	2	7	7	7	7	5	6	4	7	7	6	7	7	6	4	1	1
1	2	2	3	2	1	1	2	2	1	2	3	1	1	1	1	1	2	1	2	2	1	1	1	1	1	1	1	1	1	7	7	4	3	1	7	7	1	7	7	5	7	7	7	7	7	7	4	0	1
2	3	4	2	2	2	2	3	2	4	4	4	4	3	2	1	3	4	2	1	1	1	1	1	1	1	1	3	3	3	7	5	4	5	2	5	4	6	7	7	5	7	5	4	7	7	7	4	0	1
2	3	3	4	4	1	1	1	1	1	1	3	2	1	1	1	1	1	1	1	1	1	1	1	1	1	1	1	2	4	7	6	4	5	5	5	4	7	4	4	4	7	7	4	7	7	7	4	0	1
1	1	2	1	1	2	2	4	4	5	4	1	1	1	1	1	1	1	4	1	1	1	1	3	1	1	1	4	1	7	7	2	3	7	7	6	6	7	5	7	3	2	7	7	7	7	7	5	0	1
1	1	2	1	1	2	2	4	4	5	4	3	1	1	1	1	1	1	1	1	1	1	1	1	1	1	1	1	1	5	7	3	5	5	7	5	5	6	5	6	5	3	7	7	7	7	3	5	0	1
1	2	2	1	2	1	1	1	1	1	1	2	2	1	1	2	2	3	1	1	3	1	1	1	1	2	2	3	3	7	7	5	5	7	7	7	7	7	7	7	6	6	7	7	7	3	5	7	0	1
1	1	2	3	1	1	1	1	1	1	1	4	1	1	1	1	1	1	1	1	1	1	1	1	1	1	1	1	1	6	7	7	6	6	7	6	5	3	7	6	1	7	7	6	7	7	7	7	0	4
1	1	1	2	3	1	1	1	1	1	1	1	1	1	1	1	1	1	2	1	1	1	1	1	1	1	1	1	1	4	7	5	4	4	7	1	1	7	7	7	6	7	7	7	7	7	7	7	0	1
2	1	1	1	2	2	2	1	1	1	2	4	2	3	1	1	4	5	4	2	1	3	1	1	1	2	2	1	2	2	6	5	5	6	7	4	5	6	6	6	6	5	6	7	6	7	6	6	1	1
2	1	1	2	2	1	1	1	1	2	1	3	1	1	1	1	1	1	1	1	1	1	1	4	1	1	4	1	4	6	4	7	5	5	4	3	2	7	6	4	2	2	3	7	6	5	4	7	1	1
1	1	1	3	3	1	1	1	1	1	1	2	4	1	4	3	5	5	1	1	1	1	1	1	1	1	1	1	1	6	7	3	5	3	7	4	2	7	3	4	4	6	4	2	5	7	4	7	0	2
1	2	3	3	3	1	1	1	1	1	1	5	4	1	1	1	1	4	1	1	1	5	1	1	2	1	2	2	4	7	7	7	7	7	7	7	7	7	7	7	6	7	7	7	7	7	1	7	0	1
1	2	3	3	3	1	1	1	1	1	1	4	2	2	1	1	2	2	2	1	3	2	1	2	3	1	1	2	1	2	7	2	6	6	2	6	7	6	6	7	6	6	7	7	7	6	6	7	0	0
1	2	2	2	1	1	1	1	1	1	1	3	4	3	4	1	3	4	2	1	4	1	4	4	5	5	4	5	5	2	7	7	6	6	7	6	7	7	7	7	6	7	2	7	7	7	1	7	0	4
1	1	1	2	2	1	1	2	2	2	3	3	3	4	1	1	1	1	1	1	1	1	1	1	4	1	1	1	3	2	6	2	1	3	4	4	4	1	4	4	4	4	1	4	4	4	4	4	1	2
2	1	1	4	3	1	1	1	1	1	1	2	1	1	1	3	2	1	2	2	1	2	1	1	2	1	5	5	5	1	1	5	1	4	1	6	1	3	4	6	1	1	1	4	1	1	1	1	0	2
1	2	2	2	2	1	1	1	1	5	1	3	2	1	3	2	1	1	1	1	1	1	5	4	3	5	1	3	4	7	7	7	4	2	7	7	7	7	4	5	4	5	4	7	1	7	7	3	0	1
2	1	1	2	4	1	1	3	2	1	3	3	1	1	1	1	1	1	1	1	1	1	1	1	1	1	1	1	1	2	7	7	7	1	7	7	7	6	4	5	7	1	1	7	1	1	1	7	0	2
1	3	5	2	2	2	2	1	1	1	1	1	5	1	1	1	1	1	1	1	1	1	1	1	1	1	1	3	2	3	1	3	3	1	1	6	7	1	7	7	7	7	1	7	5	1	1	7	0	2
1	2	3	1	1	1	1	1	1	1	1	5	5	2	2	4	1	1	1	1	1	1	1	1	4	1	1	4	4	7	7	7	7	1	7	7	7	1	7	7	1	7	1	1	7	7	1	1	0	0
2	2	3	2	2	1	2	1	1	1	1	4	1	1	1	1	2	1	1	1	1	1	2	1	1	1	1	1	2	7	2	7	5	5	7	6	5	3	6	7	7	2	7	6	7	7	2	6	0	2
2	1	1	1	1	2	2	1	1	1	1	1	1	2	1	1	1	1	3	1	1	2	1	1	1	4	1	1	2	6	6	6	7	7	2	4	7	1	7	4	5	1	7	3	7	7	7	7	2	3
2	3	3	2	2	1	1	2	1	1	1	5	4	5	1	1	1	5	1	1	1	1	1	1	1	4	1	1	2	6	1	2	4	4	7	1	4	7	7	2	2	7	1	1	5	1	1	7	2	4
1	2	2	2	3	1	1	1	1	1	1	3	5	1	1	1	1	1	1	1	1	1	1	1	1	1	1	1	1	7	1	4	2	2	1	7	7	7	7	7	7	1	1	7	1	2	1	4	0	4
1	2	5	3	1	2	2	1	1	5	5	5	5	5	5	5	5	5	5	5	5	5	5	5	5	5	5	5	5	7	7	4	7	7	7	7	7	1	7	7	7	1	1	7	1	5	1	5	1	2
1	2	3	1	1	2	2	1	1	1	1	1	1	1	1	1	1	1	1	1	1	1	1	1	1	1	1	1	1	7	1	2	7	7	1	1	7	1	7	7	7	7	1	7	1	1	1	7	0	4
1	2	2	4	3	1	1	1	1	1	1	1	1	1	1	1	1	1	1	1	1	1	1	1	1	1	1	1	1	7	1	1	1	7	1	7	7	1	7	7	7	1	2	7	1	1	1	7	0	4
1	2	3	2	2	1	1	5	5	5	5	5	5	5	3	3	5	5	4	5	4	5	1	1	4	4	3	5	5	7	1	2	7	7	1	7	7	6	7	7	7	7	1	7	1	1	1	7	0	0
1	2	3	2	2	1	1	1	1	1	1	3	1	1	1	1	1	1	2	1	2	1	1	1	1	1	1	1	1	4	7	7	4	7	7	7	7	7	4	7	1	7	7	4	7	7	7	7	0	1
1	1	1	4	4	1	1	1	1	1	1	5	4	2	1	1	1	2	4	1	1	3	1	1	4	1	3	4	4	7	7	5	4	7	6	6	5	7	6	7	6	7	7	7	7	7	6	7	0	3
1	2	3	2	2	1	1	1	1	1	1	4	4	3	3	2	4	4	2	1	2	2	2	2	4	2	2	4	2	6	1	5	6	6	1	6	5	3	6	6	5	1	1	6	1	1	1	6	1	3
1	2	3	4	2	1	1	2	2	1	1	4	3	2	2	1	1	1	1	1	1	1	1	1	1	1	1	1	2	7	1	1	6	6	1	5	6	6	6	6	6	1	1	6	1	1	6	7	0	3
1	1	1	3	3	1	1	1	1	1	1	5	5	1	2	1	4	4	1	1	1	1	1	1	1	1	1	2	5	1	7	7	6	2	7	7	6	4	7	7	3	7	7	7	7	7	7	5	0	1
1	2	3	2	1	1	1	1	1	1	1	1	2	1	1	1	2	2	2	1	1	1	1	1	1	1	1	2	4	6	7	7	5	5	7	5	2	7	6	6	6	7	7	6	7	7	7	6	0	1
1	1	2	3	3	1	2	3	2	3	2	2	4	1	1	1	1	1	4	1	1	4	1	1	2	1	2	2	5	5	7	3	6	7	6	5	7	3	2	6	3	3	7	5	7	5	4	7	1	4
1	1	1	4	4	1	1	1	1	1	1	4	4	2	2	1	1	2	4	1	1	4	1	1	1	1	2	4	4	7	7	3	7	6	7	7	7	5	7	7	7	7	7	7	7	7	7	7	0	2
2	2	2	3	3	1	1	1	1	1	1	4	1	1	2	2	1	1	1	1	1	1	1	1	1	1	1	2	4	3	6	4	5	7	7	7	7	4	7	7	7	4	7	7	7	7	7	7	0	1
2	1	1	1	1	1	1	2	2	1	2	1	5	1	1	1	1	1	1	1	1	1	1	1	1	1	2	5	1	7	7	3	7	7	7	7	7	7	7	7	7	7	7	7	7	7	7	7	0	2
1	2	2	1	3	1	1	2	2	2	2	4	4	3	2	2	2	4	2	2	2	2	2	2	2	5	4	5	5	7	2	2	5	7	1	6	6	1	6	6	5	1	1	7	1	1	1	6	0	2
1	2	2	3	3	1	1	1	1	1	1	4	3	1	1	1	4	1	1	1	1	1	1	1	1	1	1	1	1	6	2	6	5	5	3	4	5	5	7	7	7	3	1	7	1	2	1	7	0	3
1	1	1	3	2	2	2	1	1	1	1	5	3	4	1	1	4	5	5	1	1	5	1	1	1	1	1	5	4	7	6	2	4	1	3	7	4	7	7	7	7	7	7	7	7	3	3	6	0	2
1	2	2	2	2	1	2	1	1	1	1	4	2	1	1	1	1	1	1	1	2	1	1	1	1	1	1	4	4	7	7	7	6	7	1	7	7	3	7	7	7	7	7	7	7	7	7	7	0	0
1	1	1	2	1	1	1	1	1	1	1	5	5	1	1	2	5	4	2	1	2	1	1	4	3	2	3	5	2	7	7	4	7	6	5	5	5	3	3	7	7	2	3	7	7	7	6	7	0	0
1	1	1	4	4	1	1	1	1	1	1	2	4	1	1	2	2	2	1	1	1	1	4	5	1	4	1	1	1	7	7	3	2	5	5	3	6	7	7	6	3	3	5	6	6	7	6	6	0	1
1	3	4	3	3	1	1	1	1	1	1	4	4	2	1	1	1	4	2	1	2	1	1	2	2	1	1	2	4	6	7	3	7	6	5	4	7	6	7	7	6	1	7	7	5	7	6	6	0	2
2	2	2	1	2	2	1	3	2	1	2	4	1	1	1	1	1	1	1	1	1	1	1	1	1	4	1	4	4	4	5	2	5	5	2	3	5	2	4	5	4	3	2	4	2	5	2	6	2	2
1	2	3	2	2	1	1	1	1	1	1	2	1	1	1	1	1	1	1	1	1	1	1	1	1	1	1	1	1	6	1	4	5	5	1	4	4	1	4	5	5	2	2	5	2	3	3	6	0	2
1	1	1	2	2	1	2	1	1	1	1	2	3	1	1	1	2	1	2	1	1	2	1	1	1	2	4	3	2	4	1	3	4	4	1	4	4	2	7	5	6	1	1	7	1	1	2	6	0	1
1	1	1	3	4	1	1	1	1	1	1	2	1	1	1	1	1	1	1	1	1	1	1	1	1	1	1	1	1	7	7	7	7	7	7	7	7	7	7	4	4	6	5	4	7	7	4	4	0	0
1	1	2	3	2	1	1	2	1	4	3	2	3	3	1	1	2	5	1	3	5	2	4	2	5	1	5	3	2	7	7	2	7	7	5	7	7	1	7	7	7	7	7	7	7	1	1	7	0	0
1	2	3	3	3	1	1	1	1	1	1	3	3	3	2	1	2	3	1	1	3	3	2	1	4	1	1	3	1	6	7	2	7	7	6	7	7	6	7	7	7	6	7	7	7	7	6	7	0	0
2	3	3	3	2	1	1	1	1	1	1	2	1	1	1	1	1	2	1	1	1	1	1	1	1	1	1	1	1	7	7	1	7	7	7	7	7	6	7	7	7	1	7	7	7	7	7	7	0	0
1	3	4	3	3	1	1	1	1	1	1	2	1	1	1	1	1	1	1	1	1	1	1	1	1	1	1	1	1	7	7	7	5	7	7	7	7	7	7	7	7	7	7	7	7	7	7	7	0	0
1	3	3	4	3	1	1	1	1	1	1	4	1	1	1	1	1	4	1	1	1	1	1	1	1	1	1	1	1	7	7	7	7	5	7	7	7	5	7	7	7	7	7	7	7	7	1	7	0	0
1	2	2	4	4	1	1	1	1	1	1	3	3	1	1	1	1	1	1	1	1	1	1	1	1	1	1	1	1	7	7	7	7	7	4	7	7	7	7	7	7	7	7	7	7	7	7	7	0	0
2	2	2	3	4	1	2	1	1	1	1	4	1	1	1	1	1	2	1	1	1	1	1	1	1	1	1	1	1	7	7	3	7	7	7	7	7	7	7	7	7	7	7	7	7	7	7	7	0	1
1	2	3	1	2	2	1	2	1	1	3	2	5	1	1	1	1	1	1	1	1	1	1	1	1	2	2	1	2	7	7	7	7	5	4	7	7	7	7	7	7	1	7	7	7	7	7	7	0	1
1	2	3	1	3	1	2	1	1	1	1	5	5	5	1	1	5	5	5	1	1	5	1	1	1	5	1	5	5	7	7	7	7	7	7	7	7	7	7	7	7	7	1	7	7	7	1	7	0	0
1	1	1	3	2	2	1	1	1	1	1	1	5	1	1	1	1	1	1	1	1	1	1	1	1	1	1	1	5	4	7	7	2	7	6	6	5	7	5	1	1	7	7	1	7	7	7	7	0	0
1	3	3	4	4	1	1	1	1	1	1	1	1	1	1	1	1	1	1	1	1	1	1	1	1	1	1	1	1	7	7	7	7	7	7	7	3	7	7	7	7	7	7	7	7	7	7	7	0	0
2	2	3	4	3	2	1	1	1	1	1	4	4	1	1	1	3	2	1	1	1	1	1	4	4	2	2	4	3	6	7	5	7	7	7	7	3	5	7	7	7	7	7	7	7	7	7	7	0	0
2	3	4	3	3	1	2	1	1	1	1	3	3	2	1	1	2	3	1	1	2	1	1	1	1	1	2	3	2	5	6	6	5	5	7	5	6	6	5	5	5	6	6	5	6	6	6	5	0	0
1	3	3	3	3	1	1	1	1	1	1	4	5	4	3	4	3	4	5	1	3	4	3	3	5	3	4	4	3	6	5	4	6	6	5	6	6	5	6	6	6	2	5	6	6	5	5	6	0	0
2	1	1	4	4	1	1	1	1	1	1	4	5	4	3	4	4	2	2	3	3	3	3	3	2	2	3	4	4	7	5	5	7	7	6	7	4	6	7	7	6	5	5	7	6	6	6	7	0	4
2	2	2	3	2	2	2	2	2	2	2	4	4	2	2	2	2	2	2	2	2	2	2	2	2	2	2	2	2	3	4	4	4	3	3	4	4	4	4	4	4	4	4	4	2	2	2	4	1	2
1	2	2	3	3	1	2	1	1	1	1	5	5	3	2	1	1	5	5	1	1	5	1	1	1	1	5	5	5	4	7	7	4	3	4	2	4	1	4	4	4	6	1	4	2	7	7	5	0	0
1	1	1	4	1	1	1	1	2	1	1	1	1	1	1	1	1	1	2	1	2	1	1	1	1	1	1	1	2	6	2	4	5	6	2	4	5	3	5	6	6	2	3	6	2	5	3	6	0	4
1	3	4	3	3	1	2	1	1	1	1	5	5	1	1	1	1	1	5	1	1	5	5	5	5	1	5	5	5	1	1	1	1	5	1	5	7	1	7	7	4	1	1	4	1	1	1	4	0	0
1	3	3	1	1	1	1	1	1	1	1	4	3	2	1	1	1	4	4	1	1	2	1	1	1	2	1	2	2	5	1	1	4	5	5	7	7	1	7	5	5	1	1	5	1	1	5	5	3	0
2	2	2	1	1	2	2	1	1	1	1	3	3	4	1	1	1	1	1	1	1	1	1	1	1	1	1	4	1	2	4	3	1	2	5	3	4	1	5	6	6	2	5	3	1	1	1	6	0	0
1	3	3	2	2	2	2	1	1	1	1	3	2	1	1	1	1	3	1	1	1	1	1	1	1	1	1	1	1	3	1	1	7	7	1	7	7	1	7	7	7	1	1	7	1	1	1	7	1	0
1	1	1	1	3	1	2	1	1	1	2	4	5	3	1	4	4	3	5	5	2	4	2	2	5	3	2	2	2	7	1	1	7	7	1	7	7	6	7	2	2	1	1	7	1	1	1	7	1	0
2	2	2	2	2	1	1	1	1	1	1	3	4	3	2	1	4	3	4	3	1	1	3	1	1	4	4	4	4	3	4	2	1	7	1	7	6	1	4	4	5	1	1	4	1	1	4	7	0	0
1	2	2	3	2	1	1	1	1	1	1	1	1	1	1	1	1	1	1	1	1	1	1	1	1	1	1	1	1	4	1	1	4	1	1	4	5	1	7	4	7	1	1	7	1	1	1	7	0	0
1	2	2	2	2	1	1	1	1	2	2	4	3	2	2	3	4	3	3	3	3	3	3	3	3	5	5	5	5	6	6	3	4	5	5	5	4	5	5	4	4	4	4	4	5	5	5	4	1	2
1	2	2	2	2	1	1	1	1	2	2	4	3	2	2	3	4	3	3	3	3	3	3	3	3	5	5	5	5	6	2	5	4	5	3	5	4	3	5	4	4	4	4	4	3	3	3	4	1	2
[truncated: 122 more columns]
